# Supplementary material for: Climate and host‐plant associations shaped the evolution of ceutorhynch weevils throughout the Cenozoic
Source: PubMed Central journal article supplement — Evolution. 2018 Aug 10;72(9):1815–28. doi: 10.1111/evo.13520 (PMC6175111; doi:10.1111/evo.13520), 2018-08-10

**Table S1:** Sampling ratio of all included genera of Ceutorhynchinae. Total number of described species (Total), number of species included in our dataset (Dataset), sampling ratio (Ratio), and missing species numbers (Missing) are provided.

| <b>Genus</b>            | <b>Total</b> | <b>Dataset</b> | <b>Ratio</b> | <b>Missing</b> |
|-------------------------|--------------|----------------|--------------|----------------|
| <i>Amalorrhynchus</i>   | 2            | 1              | 0.50         | 1              |
| <i>Amalus</i>           | 1            | 1              | 1.00         | 0              |
| <i>Aphytobius</i>       | 7            | 2              | 0.29         | 5              |
| <i>Auleutes</i>         | 8            | 1              | 0.13         | 7              |
| <i>Brachiodontus</i>    | 6            | 1              | 0.17         | 5              |
| <i>Ceutorhynchoides</i> | 9            | 1              | 0.11         | 8              |
| <i>Ceutorhynchus</i>    | 407          | 69             | 0.17         | 338            |
| <i>Cnemogonus</i>       | 1            | 1              | 1.00         | 0              |
| <i>Coeliastes</i>       | 3            | 1              | 0.33         | 2              |
| <i>Coelioderes</i>      | 26           | 2              | 0.08         | 24             |
| <i>Coeliodes</i>        | 34           | 6              | 0.18         | 28             |
| <i>Coeliodinus</i>      | 7            | 1              | 0.14         | 6              |
| <i>Cyphosenus</i>       | 10           | 1              | 0.10         | 9              |
| <i>Datonychidius</i>    | 2            | 1              | 0.50         | 1              |
| <i>Datonychus</i>       | 20           | 4              | 0.20         | 16             |
| <i>Drupenatus</i>       | 1            | 1              | 1.00         | 0              |
| <i>Eubrychius</i>       | 1            | 1              | 1.00         | 0              |
| <i>Euhrychiopsis</i>    | 1            | 1              | 1.00         | 0              |
| <i>Glocianus</i>        | 28           | 4              | 0.14         | 24             |
| <i>Hadroplontus</i>     | 3            | 3              | 1.00         | 0              |
| <i>Hainokisaruzo</i>    | 10           | 1              | 0.10         | 9              |
| <i>Hesperorrhynchus</i> | 5            | 3              | 0.60         | 2              |
| <i>Homorosoma</i>       | 8            | 1              | 0.13         | 7              |
| <i>Marmaropus</i>       | 1            | 1              | 1.00         | 0              |
| <i>Mesoxyonyx</i>       | 5            | 1              | 0.20         | 4              |
| <i>Micrelus</i>         | 20           | 2              | 0.10         | 18             |
| <i>Microplontus</i>     | 18           | 4              | 0.22         | 14             |
| <i>Mogulones</i>        | 67           | 18             | 0.27         | 49             |
| <i>Mogulonoides</i>     | 1            | 1              | 1.00         | 0              |
| <i>Mononychus</i>       | 3            | 1              | 0.33         | 2              |
| <i>Nedyus</i>           | 3            | 1              | 0.33         | 2              |
| <i>Neoglocianus</i>     | 6            | 2              | 0.33         | 4              |
| <i>Neophytobius</i>     | 10           | 1              | 0.10         | 9              |
| <i>Oprohinus</i>        | 9            | 2              | 0.22         | 7              |
| <i>Parauleutes</i>      | 8            | 1              | 0.13         | 7              |
| <i>Parethelcus</i>      | 2            | 2              | 1.00         | 0              |
| <i>Paroxyonyx</i>       | 8            | 7              | 0.88         | 1              |
| <i>Pelenomus</i>        | 24           | 4              | 0.17         | 20             |
| <i>Phrydiuchus</i>      | 5            | 4              | 0.80         | 1              |
| <i>Phytobius</i>        | 4            | 1              | 0.25         | 3              |
| <i>Poophagus</i>        | 3            | 1              | 0.33         | 2              |
| <i>Ranunculiphilus</i>  | 6            | 1              | 0.17         | 5              |
| <i>Rhinoncus</i>        | 36           | 7              | 0.19         | 29             |
| <i>Rutidosoma</i>       | 2            | 1              | 0.50         | 1              |
| <i>Scleropteridius</i>  | 3            | 1              | 0.33         | 2              |
| <i>Scleropteroides</i>  | 1            | 1              | 1.00         | 0              |
| <i>Scleropterus</i>     | 6            | 1              | 0.17         | 5              |
| <i>Sirocalodes</i>      | 19           | 4              | 0.21         | 15             |
| <i>Stenocarus</i>       | 3            | 2              | 0.67         | 1              |
| <i>Tapeinotus</i>       | 1            | 1              | 1.00         | 0              |
| <i>Thamiocolus</i>      | 40           | 9              | 0.23         | 31             |
| <i>Trichocoeliodes</i>  | 2            | 1              | 0.50         | 1              |
| <i>Trichosirocalus</i>  | 17           | 6              | 0.35         | 11             |
| <i>Wagnerinus</i>       | 4            | 3              | 0.75         | 1              |
| <i>Xenysmoderes</i>     | 26           | 2              | 0.08         | 24             |
| <i>Zacladus</i>         | 7            | 2              | 0.29         | 5              |

**Table S2:** Taxon sampling including NCBI genbank accession numbers. Tissue and DNA samples of included specimens (except for GenBank-derived sequences) are available from the biobank of the Zoologisches Forschungsmuseum A. Koenig (ZFMK) Bonn, Germany and the Department of Botany and Biodiversity Research, University of Vienna, Austria. Accession numbers with (\*) refer to the 3' end fragment of the non-barcoding region of the COI. Barcode fragments of these sequences are to be released soon to GenBank within the Molecular Weevil Identification project. They are currently available upon request from the ZFMK biobank.

| Subfamily                  | Tribus                      | Species                              | COI                   | EF1                      | 16S      | 28S      |
|----------------------------|-----------------------------|--------------------------------------|-----------------------|--------------------------|----------|----------|
| <b>Nemonychidae</b>        |                             |                                      |                       |                          |          |          |
| Rhinorhynchinae            | Mecomacerini                | <i>Rhynchitomacerinus kuscheli</i>   | FJ867805              | FJ867890                 | -        | FJ867708 |
| Cimberidinae               | Cimberidini                 | <i>Cimberis pilosa</i>               | FJ867848              | FJ867860                 | -        | FJ867673 |
| <b>Anthribidae</b>         |                             |                                      |                       |                          |          |          |
| Anthribinae                | Platystomini                | <i>Phloeobius gigas</i>              | KF016204              | -                        | KF016340 | -        |
|                            | Sintorini                   | <i>Telala</i> sp                     | KF016238              | -                        | KF016371 | KF016510 |
| Urodontinae                | Ecelonerini                 | <i>Eupanteos ornatus</i>             | KF016230              | -                        | KF016366 | KF016502 |
|                            |                             | <i>Dendropemon albopictus</i>        | KF016203              | -                        | KF016339 | KF016472 |
|                            |                             | <i>Urodontus mesemoides</i>          | FJ867818              | FJ867897                 | -        | FJ867725 |
|                            |                             | <i>Urodontellus</i> sp               | KF016202              | -                        | KF016338 | KF016471 |
| <b>Attelabidae</b>         |                             |                                      |                       |                          |          |          |
| Attelabinae                | Attelabini                  | <i>Attelabus nitens</i>              | KM452306/<br>HQ164855 | -                        | -        | -        |
| Rhynchitinae               | Deporaini                   | <i>Deporaus betulae</i>              | KM452447/<br>HQ165347 | -                        | -        | AB970607 |
| Apoderinae                 | Apoderini                   | <i>Apoderus jekelii</i>              | HQ883611              | HQ883697                 | -        | HQ883529 |
| <b>Belidae</b>             |                             |                                      |                       |                          |          |          |
| Belinae                    |                             | <i>Cyrotiphys</i> sp                 | KF016233              | -                        | KF016367 | KF016505 |
| <b>Brentidae</b>           |                             |                                      |                       |                          |          |          |
| Brentinae                  | Arrhenodini                 | <i>Ectocemus decemmaculatus</i>      | KF016163              | -                        | KF016289 | KF016425 |
|                            | Eremoxenini                 | <i>Kleineella barbata</i>            | KF016164              | -                        | KF016290 | KF016426 |
|                            | Cyladini                    | <i>Cylas formicarius</i>             | FJ867849/E<br>U522676 | FJ867862                 | AJ495572 | FJ867676 |
| Eurhynchinae               | Eurhynchini                 | <i>Aporhina australis</i>            | FJ867840              | -                        | -        | FJ867657 |
| Nanophyinae                | Nanophyini                  | <i>Nanodiscus transversus</i>        | KY084067              | KY083826                 | KY084219 | KY084006 |
|                            |                             | <i>Hypophyes pallidulus</i>          | KY084057              | KY083818                 | KY084204 | -        |
|                            |                             | <i>Antliarhininae</i>                | Antliarhinini         | <i>Antliarhis zamiae</i> | FJ867838 | FJ867853 |
| Apioninae                  | Rhinorhynchidiini           | <i>Rhinorhynchidius australasiae</i> | KF016159              | -                        | KF016286 | KF016421 |
|                            | Apionini                    | <i>Perapion neofallax</i>            | KY084071              | KY083833                 | KY084228 | KY084014 |
|                            |                             | <i>Protapion dissimile</i>           | KY084075              | KY083832                 | KY084227 | KY084013 |
|                            |                             | <i>Rhopalapion longirostre</i>       | KY084115              | KY083777                 | KY084149 | KY083943 |
| <b>Curculionidae</b>       |                             |                                      |                       |                          |          |          |
| Dryophthorinae             | Rhynchophorini              | <i>Dynamis borassi</i>               | AY131106              | AY131134                 | -        | AY131076 |
| Brachycerinae              | Himasthlophallini           | <i>Himasthlophallus flagellifer</i>  | HQ883655              | HQ883730                 | -        | HQ883569 |
| Molytinae                  | Amorphocerini               | <i>Amorphocerus rufipes</i>          | HQ883665              | HQ883736                 | -        | HQ883575 |
| Hylobiinae                 | Hyperini                    | <i>Hypera meles</i>                  | MH458432              | -                        | -        | -        |
|                            |                             | <i>Hypera postica</i>                | MH458433              | -                        | -        | -        |
| Entiminae                  | Otiorhynchini               | <i>Otiorhynchus ligustici</i>        | MH458434              | -                        | -        | -        |
|                            |                             | <i>Otiorhynchus pinastri</i>         | MH458435              | -                        | -        | -        |
| Curculioninae              | Curculionini                | <i>Curculio camelliae</i>            | AB573507              | AY327652                 | -        | AB573470 |
| Ceutorhynchinae            | Mononychini                 | <i>Mononychus punctumalbum</i>       | MH433523*             | MH433392                 | MH433106 | MH433256 |
|                            |                             | <i>Amalus scortillum</i>             | MH433452*             | MH433339                 | MH433034 | MH433190 |
|                            | Amalini                     | <i>Aphytobius sphaerion</i>          | -                     | -                        | MH433035 | MH433191 |
|                            |                             | <i>Aphytobius veronicae</i>          | MH433453*             | MH433340                 | MH433036 | MH433192 |
|                            |                             | <i>Eubrychius velutus</i>            | MH433519*             | MH433390                 | MH433102 | MH433253 |
|                            | Phytobiini                  | <i>Euhrychiopsis lecontei</i>        | KJ203066*             | -                        | -        | -        |
|                            |                             | <i>Pelenomus canaliculatus</i>       | MH433569*             | MH433423                 | MH433152 | MH433302 |
|                            |                             | <i>Pelenomus commari</i>             | MH433570*             | -                        | MH433153 | MH433303 |
|                            |                             | <i>Pelenomus quadrituberculatus</i>  | KJ963126              | -                        | -        | -        |
|                            |                             | <i>Pelenomus velaris</i>             | MH433580*             | -                        | MH433163 | MH433313 |
|                            |                             | <i>Phytobius leucogaster</i>         | MH433574*             | -                        | MH433157 | MH433307 |
|                            |                             | <i>Neophytobius granatus</i>         | MH433563*             | -                        | MH433146 | MH433296 |
|                            |                             | <i>Rhinoncus albicinctus</i>         | MH433581*             | MH433429                 | MH433164 | MH433314 |
|                            | <i>Rhinoncus bruchoides</i> | MH433532*                            | -                     | MH433115                 | MH433264 |          |
|                            | <i>Rhinoncus castor</i>     | MH433582*                            | MH433430              | MH433165                 | MH433315 |          |
| <i>Rhinoncus henningsi</i> | MH433584*                   | MH433432                             | MH433167              | MH433317                 |          |          |

| Subfamily | Tribus         | Species                                  | COI       | EF1      | 16S      | 28S      |
|-----------|----------------|------------------------------------------|-----------|----------|----------|----------|
|           |                | <i>Rhinoncus inconspicuos</i>            | MH433585* | MH433433 | MH433168 | MH433318 |
|           |                | <i>Rhinoncus pericarpus</i>              | MH458431  | MH433398 | MH433112 | -        |
|           |                | <i>Rhinoncus perpendicularatus</i>       | MH433529* | MH433399 | MH433113 | MH433262 |
|           |                | <i>Marmaropus bessei</i>                 | MH433540* | -        | -        | MH433272 |
|           | Scleropterini  | <i>Rutidosoma globulus</i>               | -         | MH433400 | -        | -        |
|           |                | <i>Scleropteridius fallax</i>            | -         | MH433435 | -        | MH433320 |
|           |                | <i>Scleropterus serratus</i>             | -         | MH433438 | AB232979 | MH433323 |
|           |                | <i>Scleropterides hypocrita</i>          | MH458423  | -        | AB232980 | -        |
|           |                | <i>Tapeinotus sellatus</i>               | MH433594* | -        | AB232981 | MH433330 |
|           |                | <i>Brachiodontus reitteri</i>            | MH433454* | -        | MH433038 | MH433193 |
|           |                | <i>Homorosoma validirostre</i>           | MH433535* | MH433405 | MH433118 | MH433267 |
|           | Mecysmoderini  | <i>Xenysmoderes consularis</i>           | MH458422  | -        | MH433188 | -        |
|           |                | <i>Coelioderes nigrinus</i>              | MH458425  | -        | AB232978 | -        |
|           | Egriini        | <i>Cyphosenus grouvellei</i>             | -         | -        | AB232977 | -        |
|           | Cnemogonini    | <i>Cnemogonus</i> sp                     | JF888214  | -        | -        | -        |
|           |                | <i>Auleutes epilobii</i>                 | JF888244  | -        | -        | -        |
|           |                | <i>Parauleutes nebulosus</i>             | HQ989957  | -        | -        | -        |
|           | Coeliadini     | <i>Coeliodes dryados</i>                 | GU981474  | -        | -        | -        |
|           |                | <i>Coeliodes nakanoensis</i>             | -         | -        | AB232961 | -        |
|           |                | <i>Coeliodes rana</i>                    | MH433493* | -        | MH433079 | MH433231 |
|           |                | <i>Coeliodes ruber</i>                   | MH433497* | -        | -        | MH433235 |
|           |                | <i>Coeliodes transversealbofasciatus</i> | MH433508* | -        | MH433093 | MH433246 |
|           |                | <i>Coelioidinus rubicundus</i>           | MH433498* | MH433382 | MH433083 | MH433236 |
|           |                | <i>Trichocoeliodes excavatus</i>         | -         | -        | AB232970 | -        |
|           | Oxyonychini    | <i>Barioxyonyx kerzhneri</i>             | MH458427  | -        | MH433037 | -        |
|           |                | <i>Barioxyonyx retectus</i>              | MH433455* | -        | MH433039 | MH433194 |
|           |                | <i>Barioxyonyx tournieri</i>             | MH433455* | -        | MH433039 | MH433194 |
|           |                | <i>Mesoxonyx sicardi</i>                 | MH433456* | -        | MH433040 | MH433195 |
|           |                | <i>Paroxyonyx audisioi</i>               | MH433567* | MH433421 | -        | MH433300 |
|           |                | <i>Paroxyonyx cinctus</i>                | MH433573* | -        | MH433156 | MH433306 |
|           |                | <i>Paroxyonyx fallaciosus</i>            | MH433571* | -        | MH433154 | MH433304 |
|           |                | <i>Paroxyonyx imitator</i>               | MH433572* | -        | MH433155 | MH433305 |
|           |                | <i>Paroxyonyx petrae</i>                 | MH458429  | -        | -        | -        |
|           |                | <i>Paroxyonyx</i> sp                     | MH458430  | -        | MH433150 | -        |
|           | Ceutorhynchini | <i>Amalorrhynchus melanarius</i>         | HQ164845  | EU111040 | -        | -        |
|           |                | <i>Ceutorhynchoides styracis</i>         | -         | -        | AB232958 | -        |
|           |                | <i>Ceutorhynchus aeneicollis</i>         | MH433457* | MH433341 | MH433041 | MH433196 |
|           |                | <i>Ceutorhynchus alliariae</i>           | MH433458* | MH433342 | MH433042 | MH433197 |
|           |                | <i>Ceutorhynchus alyssi</i>              | MH433459* | MH433343 | MH433043 | MH433198 |
|           |                | <i>Ceutorhynchus arator</i>              | MH433460* | MH433344 | MH433044 | MH433199 |
|           |                | <i>Ceutorhynchus assimilis</i>           | MH433461* | MH433345 | MH433045 | MH433200 |
|           |                | <i>Ceutorhynchus atomus</i>              | MH433462* | MH433346 | MH433046 | MH433201 |
|           |                | <i>Ceutorhynchus barbarae</i>            | KJ964086  | -        | -        | -        |
|           |                | <i>Ceutorhynchus canariensis</i>         | MH433463* | MH433347 | MH433047 | MH433202 |
|           |                | <i>Ceutorhynchus carinatus</i>           | MH433464* | MH433348 | MH433048 | MH433203 |
|           |                | <i>Ceutorhynchus chalybaeus</i>          | MH433465* | MH433349 | MH433049 | MH433204 |
|           |                | <i>Ceutorhynchus chlorophanus</i>        | MH433466* | MH433350 | MH433050 | MH433205 |
|           |                | <i>Ceutorhynchus cochleriae</i>          | KU917063  | MH433402 | -        | -        |
|           |                | <i>Ceutorhynchus coeruleascens</i>       | MH433467* | MH433351 | MH433051 | MH433206 |
|           |                | <i>Ceutorhynchus constrictus</i>         | EU110955  | MH433352 | -        | -        |
|           |                | <i>Ceutorhynchus contractus</i>          | MH433468* | MH433353 | MH433052 | MH433207 |
|           |                | <i>Ceutorhynchus dubius</i>              | MH433469* | MH433354 | MH433053 | MH433208 |
|           |                | <i>Ceutorhynchus erysimi</i>             | MH433525* | -        | -        | -        |
|           |                | <i>Ceutorhynchus fallax</i>              | DQ058699  | -        | -        | -        |
|           |                | <i>Ceutorhynchus filirostris</i>         | DQ058701  | DQ058709 | -        | -        |
|           |                | <i>Ceutorhynchus gallorhenanus</i>       | DQ058700  | -        | -        | -        |
|           |                | <i>Ceutorhynchus granulicollis</i>       | MH433470* | MH433355 | MH433054 | MH433209 |
|           |                | <i>Ceutorhynchus hampei</i>              | MH433471* | MH433356 | MH433055 | MH433210 |
|           |                | <i>Ceutorhynchus hirtulus</i>            | MH433472* | MH433357 | MH433056 | MH433211 |
|           |                | <i>Ceutorhynchus ignitus</i>             | MH433473* | MH433358 | MH433057 | MH433212 |
|           |                | <i>Ceutorhynchus inaeffectatus</i>       | KJ966958  | -        | -        | -        |
|           |                | <i>Ceutorhynchus intersetosus</i>        | MH433474* | MH433359 | MH433058 | MH433213 |
|           |                | <i>Ceutorhynchus jucundus</i>            | KC783783  | MH433360 | MH433059 | MH433214 |
|           |                | <i>Ceutorhynchus leprieuri</i>           | MH433476* | MH433362 | MH433061 | MH433216 |
|           |                | <i>Ceutorhynchus leucorrhama</i>         | MH433477* | MH433363 | MH433062 | MH433217 |

| Subfamily | Tribus | Species                              | COI       | EF1      | 16S      | 28S      |
|-----------|--------|--------------------------------------|-----------|----------|----------|----------|
|           |        | <i>Ceutorhynchus libertorum</i>      | MH433478* | MH433364 | MH433063 | MH433218 |
|           |        | <i>Ceutorhynchus liliputanus</i>     | MH433479* | MH433365 | MH433064 | -        |
|           |        | <i>Ceutorhynchus lukesi</i>          | -         | MH433366 | MH433065 | -        |
|           |        | <i>Ceutorhynchus merkli</i>          | MH433480* | MH433367 | MH433066 | MH433219 |
|           |        | <i>Ceutorhynchus moraviensis</i>     | MH433481* | MH433368 | MH433067 | MH433220 |
|           |        | <i>Ceutorhynchus napi</i>            | MH433482* | MH433369 | MH433068 | MH433221 |
|           |        | <i>Ceutorhynchus neglectus</i>       | DQ058697  | DQ058707 | -        | -        |
|           |        | <i>Ceutorhynchus nevadensis</i>      | MH433483* | MH433370 | MH433069 | MH433222 |
|           |        | <i>Ceutorhynchus niyazii</i>         | MH433484* | MH433371 | MH433070 | MH433223 |
|           |        | <i>Ceutorhynchus obstructus</i>      | MH433524* | MH433394 | MH433108 | MH433258 |
|           |        | <i>Ceutorhynchus pallidactylus</i>   | MH433536* | MH433406 | MH433119 | MH433268 |
|           |        | <i>Ceutorhynchus paroliniae</i>      | KU366275  | -        | -        | -        |
|           |        | <i>Ceutorhynchus parvulus</i>        | MH433485* | MH433372 | MH433071 | MH433224 |
|           |        | <i>Ceutorhynchus pectoralis</i>      | MH433486* | MH433373 | MH433072 | MH433225 |
|           |        | <i>Ceutorhynchus pervicax</i>        | MH433487* | MH433374 | MH433073 | MH433226 |
|           |        | <i>Ceutorhynchus picitarsis</i>      | MH433488* | MH433375 | MH433074 | MH433227 |
|           |        | <i>Ceutorhynchus pulvinatus</i>      | MH433489* | MH433376 | MH433075 | MH433228 |
|           |        | <i>Ceutorhynchus pumilio</i>         | MH433490* | MH433377 | MH433076 | -        |
|           |        | <i>Ceutorhynchus puncticollis</i>    | MH433491* | MH433378 | MH433077 | MH433229 |
|           |        | <i>Ceutorhynchus pyrrhorhynchus</i>  | MH433492* | MH433379 | MH433078 | MH433230 |
|           |        | <i>Ceutorhynchus querceti</i>        | DQ058704  | -        | -        | -        |
|           |        | <i>Ceutorhynchus rapae</i>           | MH433494* | MH433380 | MH433080 | MH433232 |
|           |        | <i>Ceutorhynchus resedae</i>         | MH433495* | -        | MH433081 | MH433233 |
|           |        | <i>Ceutorhynchus rhenanus</i>        | KU932046* | -        | -        | -        |
|           |        | <i>Ceutorhynchus roberti</i>         | MH433496* | MH433381 | MH433082 | MH433234 |
|           |        | <i>Ceutorhynchus sardeanensis</i>    | MH433499* | MH433383 | MH433084 | MH433237 |
|           |        | <i>Ceutorhynchus scrobicollis</i>    | MH433500* | MH433384 | MH433085 | MH433238 |
|           |        | <i>Ceutorhynchus sisymbrii</i>       | MH433501* | MH433385 | MH433086 | MH433239 |
|           |        | <i>Ceutorhynchus squamulosus</i>     | MH433502* | -        | MH433087 | MH433240 |
|           |        | <i>Ceutorhynchus striatellus</i>     | MH433503* | MH433386 | MH433088 | MH433241 |
|           |        | <i>Ceutorhynchus subpubescens</i>    | DQ058696  | -        | -        | -        |
|           |        | <i>Ceutorhynchus sulcatus</i>        | KU932047  | -        | -        | -        |
|           |        | <i>Ceutorhynchus sulcicollis</i>     | MH433504* | MH433387 | MH433089 | MH433242 |
|           |        | <i>Ceutorhynchus syrites</i>         | MH433505* | MH433388 | MH433090 | MH433243 |
|           |        | <i>Ceutorhynchus tangerianus</i>     | MH433506* | MH433389 | MH433091 | MH433244 |
|           |        | <i>Ceutorhynchus thomsoni</i>        | KJ963985  | -        | -        | -        |
|           |        | <i>Ceutorhynchus tibialis</i>        | MH433507* | -        | MH433092 | MH433245 |
|           |        | <i>Ceutorhynchus turbatus</i>        | MH433509* | -        | MH433094 | MH433247 |
|           |        | <i>Ceutorhynchus typhae</i>          | MH433526* | MH433395 | MH433109 | MH433259 |
|           |        | <i>Ceutorhynchus varius</i>          | MH433510* | -        | -        | MH433248 |
|           |        | <i>Ceutorhynchus wagneri</i>         | MH433511* | -        | MH433095 | MH433249 |
|           |        | <i>Coeliastes lamii</i>              | MH433475* | MH433361 | MH433060 | MH433215 |
|           |        | <i>Datonychidius tener</i>           | MH433518* | -        | MH433101 | MH433252 |
|           |        | <i>Datonychus delicatulus</i>        | MH433513* | -        | MH433096 | -        |
|           |        | <i>Datonychus maurus</i>             | MH433514* | -        | MH433097 | -        |
|           |        | <i>Datonychus melanostictus</i>      | MH433515* | -        | MH433098 | MH433250 |
|           |        | <i>Datonychus paszlavszkyi</i>       | MH433517* | -        | MH433100 | MH433251 |
|           |        | <i>Drupenatus nasturtii</i>          | MH433516* | -        | MH433099 | -        |
|           |        | <i>Glocianus distinctus</i>          | MH433520* | -        | MH433103 | MH433254 |
|           |        | <i>Glocianus fennicus</i>            | KJ963154  | -        | -        | -        |
|           |        | <i>Glocianus granulithorax</i>       | MH433521* | -        | MH433104 | -        |
|           |        | <i>Glocianus punctiger</i>           | MH433531* | MH433401 | MH433114 | MH433263 |
|           |        | <i>Hadroplontus ancora</i>           | -         | -        | AB232964 | -        |
|           |        | <i>Hadroplontus litura</i>           | MH433533* | MH433533 | MH433533 | MH433533 |
|           |        | <i>Hadroplontus trimaculatus</i>     | HQ164961  | -        | -        | -        |
|           |        | <i>Hainokisaruzo japonicus</i>       | -         | -        | AB232965 | -        |
|           |        | <i>Hesperorrhynchus hesperus</i>     | MH433533* | -        | -        | -        |
|           |        | <i>Hesperorrhynchus incautus</i>     | KT823495  | -        | -        | -        |
|           |        | <i>Hesperorrhynchus phytobioides</i> | MH433534* | MH433404 | MH433117 | MH433266 |
|           |        | <i>Micrelus ericae</i>               | MH433546* | MH433414 | MH433129 | MH433279 |
|           |        | <i>Micrelus ferrugatus</i>           | MH433547* | -        | MH433130 | MH433280 |
|           |        | <i>Microplontus campestris</i>       | MH433541* | -        | MH433124 | MH433274 |
|           |        | <i>Microplontus melanostigma</i>     | MH433552* | -        | MH433135 | MH433285 |
|           |        | <i>Microplontus millefolii</i>       | MH433553* | -        | MH433136 | MH433286 |
|           |        | <i>Microplontus rugulosus</i>        | MH433558* | -        | MH433142 | MH433291 |



| Subfamily | Tribus | Species                            | COI       | EF1      | 16S      | 28S      |
|-----------|--------|------------------------------------|-----------|----------|----------|----------|
|           |        | <i>Mogulones abbreviatus</i>       | MH433537* | MH433407 | MH433120 | MH433269 |
|           |        | <i>Mogulones asperifoliarum</i>    | MH433538* | MH433408 | MH433121 | MH433270 |
|           |        | <i>Mogulones austriacus</i>        | MH433539* | MH433409 | MH433122 | MH433271 |
|           |        | <i>Mogulones biondii</i>           | KC783733  | -        | MH433123 | MH433273 |
|           |        | <i>Mogulones cingulatus</i>        | MH433542* | MH433410 | MH433125 | MH433275 |
|           |        | <i>Mogulones crucifer</i>          | MH433543* | MH433411 | MH433126 | MH433276 |
|           |        | <i>Mogulones cynoglossi</i>        | MH433544* | MH433412 | MH433127 | MH433277 |
|           |        | <i>Mogulones dimidiatus</i>        | MH433545* | MH433413 | MH433128 | MH433278 |
|           |        | <i>Mogulones geographicus</i>      | MH433548* | MH433415 | MH433131 | MH433281 |
|           |        | <i>Mogulones graciosus</i>         | MH433549* |          | MH433132 | MH433282 |
|           |        | <i>Mogulones grisescens</i>        | MH433550* |          | MH433133 | MH433283 |
|           |        | <i>Mogulones larvatus</i>          | MH433551* | MH433416 | MH433134 | MH433284 |
|           |        | <i>Mogulones pallidicornis</i>     | MH433554* | MH433417 | MH433137 | MH433287 |
|           |        | <i>Mogulones peregrinus</i>        | MH433555* |          | MH433138 | MH433288 |
|           |        | <i>Mogulones pseudopollinarius</i> | KM433740  |          | MH433139 | MH433289 |
|           |        | <i>Mogulones raphani</i>           | MH433557* |          | MH433141 | MH433290 |
|           |        | <i>Mogulones soricinus</i>         | MH433560* |          | MH433144 | MH433293 |
|           |        | <i>Mogulones uncipes</i>           | MH433561* | MH433418 | MH433145 | MH433294 |
|           |        | <i>Mogulonoides radula</i>         | MH433556* | -        | MH433140 | -        |
|           |        | <i>Nedyus quadrimaculatus</i>      | KU919480  | MH433393 | MH433107 | MH433257 |
|           |        | <i>Neoglocianus albovittatus</i>   | MH433562* | MH433419 | -        | MH433295 |
|           |        | <i>Neoglocianus maculaalba</i>     | MH433564* | -        | MH433147 | MH433297 |
|           |        | <i>Oprohinus consputus</i>         | MH433565* | -        | MH433148 | MH433298 |
|           |        | <i>Oprohinus suturalis</i>         | MH433566* | MH433420 | MH433149 | MH433299 |
|           |        | <i>Parethelcus nescicola</i>       | MH433575* | MH433424 | MH433158 | MH433308 |
|           |        | <i>Parethelcus pollinarius</i>     | MH433522* | MH433391 | MH433105 | MH433255 |
|           |        | <i>Phrydiuchus augusti</i>         | MH433568* | MH433422 | MH433151 | MH433301 |
|           |        | <i>Phrydiuchus quijote</i>         | MH433576* | MH433425 | MH433159 | MH433309 |
|           |        | <i>Phrydiuchus tau</i>             | KP306843  | -        | -        | -        |
|           |        | <i>Phrydiuchus topiarius</i>       | MH433579* | MH433428 | MH433162 | MH433312 |
|           |        | <i>Poophagus sisymbrii</i>         | MH433577* | MH433426 | MH433160 | MH433310 |
|           |        | <i>Ranunculiphilus faeculentus</i> | MH433583* | MH433431 | MH433166 | MH433316 |
|           |        | <i>Sirocalodes depressicollis</i>  | MH433587* | MH433434 | MH433169 | MH433319 |
|           |        | <i>Sirocalodes mixtus</i>          | MH433588* | MH433436 | MH433170 | MH433321 |
|           |        | <i>Sirocalodes nigroterminatus</i> | MH433589* | -        | MH433171 | -        |
|           |        | <i>Sirocalodes umbrinus</i>        | -         | -        | AB232968 | -        |
|           |        | <i>Stenocarus cardui</i>           | MH433528* | MH433397 | MH433111 | MH433261 |
|           |        | <i>Stenocarus ruficornis</i>       | MH433590* | MH433437 | MH433172 | MH433322 |
|           |        | <i>Thamiocolus garajonay</i>       | MH433591* | MH433440 | MH433174 | MH433325 |
|           |        | <i>Thamiocolus grancanariensis</i> | MH433592* | -        | MH433175 | MH433326 |
|           |        | <i>Thamiocolus kraatzi</i>         | -         | -        | AB232969 | -        |
|           |        | <i>Thamiocolus niveus</i>          | MH433593* | MH433442 | MH433178 | MH433329 |
|           |        | <i>Thamiocolus signatus</i>        | MH433595* | MH433443 | MH433179 | MH433331 |
|           |        | <i>Thamiocolus sinapis</i>         | KC783848  | MH433444 | MH433180 | MH433332 |
|           |        | <i>Thamiocolus viduatus</i>        | MH433597* | MH433448 | MH433184 | MH433335 |
|           |        | <i>Thamiocolus virgatus</i>        | KM433745  | MH433449 | MH433185 | MH433336 |
|           |        | <i>Thamiocolus wollastoni</i>      | KM433748  | MH433450 | MH433186 | MH433337 |
|           |        | <i>Trichosirocalus barnevillei</i> | -         | MH433439 | MH433173 | MH433324 |
|           |        | <i>Trichosirocalus histrix</i>     | -         | -        | MH433176 | MH433327 |
|           |        | <i>Trichosirocalus horridus</i>    | KU919126  | MH433441 | MH433177 | MH433328 |
|           |        | <i>Trichosirocalus spurnyi</i>     | -         | MH433445 | MH433181 | MH433333 |
|           |        | <i>Trichosirocalus thalhammeri</i> | -         | MH433446 | MH433182 | MH433334 |
|           |        | <i>Trichosirocalus troglodytes</i> | MH433596* | MH433447 | MH433183 | -        |
|           |        | <i>Zacladus exiguus</i>            | KM442028  | MH433403 | MH433116 | MH433265 |
|           |        | <i>Zacladus geranii</i>            | MH433598* | MH433451 | MH433189 | MH433338 |
|           |        | <i>Wagnerinus costatus</i>         | -         | -        | AB232971 | -        |
|           |        | <i>Wagnerinus frugivorus</i>       | AB250208  | -        | -        | -        |
|           |        | <i>Wagnerinus harmandi</i>         | MH458421  | -        | MH433187 | -        |

**Table S2.1:** Voucher IDs of all specimens provided by the Molecular Weevil Identification project.

| Species                             | Tissue ID            | DNA Sample ID       |
|-------------------------------------|----------------------|---------------------|
| <i>Amalus scortillum</i>            | ZFMK-TIS-20134       | ZFMK-DNA-0100438735 |
| <i>Aphytobius sphaerion</i>         | ZFMK-TIS-3442        | ZFMK-DNA-0100449591 |
| <i>Aphytobius veronicae</i>         | ZFMK-TIS-3486        | ZFMK-DNA-0100449558 |
| <i>Barioxyonyx resectus</i>         | ZFMK-TIS-3436        | ZFMK-DNA-0100449608 |
| <i>Barioxyonyx tournieri</i>        | ZFMK-TIS-3624        | ZFMK-DNA-0155635653 |
| <i>Brachiodontus reitteri</i>       | ZFMK-TIS-3553        | ZFMK-DNA-0100426067 |
| <i>Ceutorhynchus aeneicollis</i>    | ZFMK-TIS-4135        | ZFMK-DNA-0100426157 |
| <i>Ceutorhynchus alliariae</i>      | ZFMK-TIS-2D100438525 | ZFMK-DNA-0100439821 |
| <i>Ceutorhynchus alyssi</i>         | ZFMK-TIS-3633        | ZFMK-DNA-0155635644 |
| <i>Ceutorhynchus arator</i>         | ZFMK-TIS-20126       | ZFMK-DNA-0100438754 |
| <i>Ceutorhynchus assimilis</i>      | ZFMK-TIS-3414        | ZFMK-DNA-0100449630 |
| <i>Ceutorhynchus atomus</i>         | ZFMK-TIS-3131        | ZFMK-DNA-0100426947 |
| <i>Ceutorhynchus canariensis</i>    | ZFMK-TIS-23883       | ZFMK-DNA-0100448123 |
| <i>Ceutorhynchus carinatus</i>      | ZFMK-TIS-20124       | ZFMK-DNA-0100438752 |
| <i>Ceutorhynchus chalybaeus</i>     | ZFMK-TIS-2D100446111 | ZFMK-DNA-0100437874 |
| <i>Ceutorhynchus chlorophanus</i>   | ZFMK-TIS-20130       | ZFMK-DNA-0100438739 |
| <i>Ceutorhynchus coeruleus</i>      | ZFMK-TIS-3686        | ZFMK-DNA-0155635588 |
| <i>Ceutorhynchus contractus</i>     | ZFMK-TIS-4195        | ZFMK-DNA-0155628512 |
| <i>Ceutorhynchus dubius</i>         | ZFMK-TIS-20178       | ZFMK-DNA-0100449039 |
| <i>Ceutorhynchus granulicollis</i>  | ZFMK-TIS-3489        | ZFMK-DNA-0100449107 |
| <i>Ceutorhynchus hampei</i>         | ZFMK-TIS-20135       | ZFMK-DNA-0100438734 |
| <i>Ceutorhynchus hirtulus</i>       | ZFMK-TIS-3476        | ZFMK-DNA-0100449577 |
| <i>Ceutorhynchus ignitus</i>        | ZFMK-TIS-20093       | ZFMK-DNA-0100438769 |
| <i>Ceutorhynchus inaeffectatus</i>  | ZFMK-TIS-2531152     | ZFMK-DNA-0171676603 |
| <i>Ceutorhynchus intersetosus</i>   | ZFMK-TIS-3425        | ZFMK-DNA-0100449622 |
| <i>Ceutorhynchus jucundus</i>       | ZFMK-TIS-2D100446904 | ZFMK-DNA-0100438046 |
| <i>Ceutorhynchus leprieuri</i>      | -                    | ZFMK-DNA-0100437869 |
| <i>Ceutorhynchus leucorrhama</i>    | ZFMK-TIS-3422        | ZFMK-DNA-0100449619 |
| <i>Ceutorhynchus libertorum</i>     | ZFMK-TIS-20142       | ZFMK-DNA-0100438936 |
| <i>Ceutorhynchus liliputanus</i>    | ZFMK-TIS-3492        | ZFMK-DNA-0100449108 |
| <i>Ceutorhynchus lukei</i>          | ZFMK-TIS-20286       | ZFMK-DNA-0100448478 |
| <i>Ceutorhynchus merkli</i>         | ZFMK-TIS-3459        | ZFMK-DNA-0100449585 |
| <i>Ceutorhynchus moraviensis</i>    | ZFMK-TIS-4196        | ZFMK-DNA-0155628513 |
| <i>Ceutorhynchus napi</i>           | ZFMK-TIS-3643        | ZFMK-DNA-0155635641 |
| <i>Ceutorhynchus nevadensis</i>     | ZFMK-TIS-3516        | ZFMK-DNA-0100426097 |
| <i>Ceutorhynchus niyazii</i>        | ZFMK-TIS-3466        | ZFMK-DNA-0100449567 |
| <i>Ceutorhynchus parvulus</i>       | ZFMK-TIS-3684        | ZFMK-DNA-0155635586 |
| <i>Ceutorhynchus pectoralis</i>     | ZFMK-TIS-4231        | ZFMK-DNA-0155630487 |
| <i>Ceutorhynchus pervicax</i>       | ZFMK-TIS-3141        | ZFMK-DNA-0100426874 |
| <i>Ceutorhynchus picitarsis</i>     | ZFMK-TIS-3467        | ZFMK-DNA-0100449568 |
| <i>Ceutorhynchus pulvinatus</i>     | ZFMK-TIS-20096       | ZFMK-DNA-0100438772 |
| <i>Ceutorhynchus pumilio</i>        | ZFMK-TIS-3158        | ZFMK-DNA-0100426843 |
| <i>Ceutorhynchus puncticollis</i>   | ZFMK-TIS-20094       | ZFMK-DNA-0100438770 |
| <i>Ceutorhynchus pyrrhorhynchus</i> | ZFMK-TIS-3195        | ZFMK-DNA-0100426928 |
| <i>Ceutorhynchus rapae</i>          | ZFMK-TIS-3641        | ZFMK-DNA-0155635639 |
| <i>Ceutorhynchus resedae</i>        | ZFMK-TIS-3167        | ZFMK-DNA-0100426837 |
| <i>Ceutorhynchus roberti</i>        | ZFMK-TIS-20089       | ZFMK-DNA-0100438966 |
| <i>Ceutorhynchus sardeanensis</i>   | ZFMK-TIS-3574        | ZFMK-DNA-0100426046 |
| <i>Ceutorhynchus scrobicollis</i>   | ZFMK-TIS-3153        | ZFMK-DNA-0100426851 |
| <i>Ceutorhynchus sisymbrii</i>      | ZFMK-TIS-3687        | ZFMK-DNA-0155635589 |
| <i>Ceutorhynchus squamulosus</i>    | ZFMK-TIS-4113        | ZFMK-DNA-0100426300 |
| <i>Ceutorhynchus striatellus</i>    | ZFMK-TIS-20141       | ZFMK-DNA-0100438721 |
| <i>Ceutorhynchus sulcicollis</i>    | ZFMK-TIS-3515        | ZFMK-DNA-0100426096 |

|                                          |                      |                     |
|------------------------------------------|----------------------|---------------------|
| <i>Ceutorhynchus syrites</i>             | ZFMK-TIS-3642        | ZFMK-DNA-0155635640 |
| <i>Ceutorhynchus tangerianus</i>         | ZFMK-TIS-3417        | ZFMK-DNA-0100449627 |
| <i>Ceutorhynchus tibialis</i>            | ZFMK-TIS-3419        | ZFMK-DNA-0100449616 |
| <i>Ceutorhynchus turbatus</i>            | ZFMK-TIS-2D100439107 | ZFMK-DNA-0100439779 |
| <i>Ceutorhynchus typhae</i>              | ZFMK-TIS-3202        | ZFMK-DNA-0100426791 |
| <i>Ceutorhynchus varius</i>              | ZFMK-TIS-20118       | ZFMK-DNA-0100438746 |
| <i>Ceutorhynchus wagneri</i>             | ZFMK-TIS-20127       | ZFMK-DNA-0100438742 |
| <i>Ceutorhynchus wellschmiedi</i>        | ZFMK-TIS-3656        | ZFMK-DNA-0155635621 |
| <i>Coeliastes lamii</i>                  | ZFMK-TIS-20087       | ZFMK-DNA-0100438919 |
| <i>Coeliodes rana</i>                    | ZFMK-TIS-3127        | ZFMK-DNA-0100426282 |
| <i>Coeliodes ruber</i>                   | ZFMK-TIS-3126        | ZFMK-DNA-0100426878 |
| <i>Coeliodes transversealbofasciatus</i> | ZFMK-TIS-4668        | ZFMK-DNA-0155628554 |
| <i>Coeliodinus rubicundus</i>            | ZFMK-TIS-3292        | ZFMK-DNA-0155633297 |
| <i>Datonychidius tener</i>               | ZFMK-TIS-3583        | ZFMK-DNA-0100426037 |
| <i>Datonychus delicatulus</i>            | ZFMK-TIS-2D100440235 | ZFMK-DNA-0100438123 |
| <i>Datonychus maurus</i>                 | ZFMK-TIS-3571        | ZFMK-DNA-0100426056 |
| <i>Datonychus melanostictus</i>          | ZFMK-TIS-3871        | ZFMK-DNA-0100449653 |
| <i>Datonychus paszlawskyi</i>            | ZFMK-TIS-3462        | ZFMK-DNA-0100449582 |
| <i>Drupenatus nasturtii</i>              | ZFMK-TIS-3569        | ZFMK-DNA-0100426243 |
| <i>Eubrychius velutus</i>                | ZFMK-TIS-20154       | ZFMK-DNA-0100438715 |
| <i>Glocianus distinctus</i>              | ZFMK-TIS-3534        | ZFMK-DNA-0100426086 |
| <i>Glocianus granulithorax</i>           | ZFMK-TIS-3570        | ZFMK-DNA-0100426055 |
| <i>Hesperorrhynchus hesperus</i>         | ZFMK-TIS-2D100446954 | ZFMK-DNA-0100438026 |
| <i>Hesperorrhynchus phytobioides</i>     | ZFMK-TIS-3577        | ZFMK-DNA-0100426043 |
| <i>Homorosoma validirostre</i>           | ZFMK-TIS-3460        | ZFMK-DNA-0100449584 |
| <i>Marmaropus besseri</i>                | ZFMK-TIS-2529969     | -                   |
| <i>Mesoxyonyx sicardi</i>                | ZFMK-TIS-3693        | ZFMK-DNA-0155628538 |
| <i>Micrelus ericae</i>                   | ZFMK-TIS-3219        | ZFMK-DNA-0155633370 |
| <i>Micrelus ferrugatus</i>               | ZFMK-TIS-3089        | ZFMK-DNA-0100448130 |
| <i>Microplontus campestris</i>           | ZFMK-TIS-2D100439095 | ZFMK-DNA-0100439767 |
| <i>Microplontus melanostigma</i>         | ZFMK-TIS-3164        | ZFMK-DNA-0100426246 |
| <i>Microplontus millefolii</i>           | ZFMK-TIS-3711        | ZFMK-DNA-0100414292 |
| <i>Microplontus rugulosus</i>            | ZFMK-TIS-20146       | ZFMK-DNA-0100438726 |
| <i>Mogulones abbreviatulus</i>           | ZFMK-TIS-3683        | ZFMK-DNA-0155635585 |
| <i>Mogulones asperifoliarum</i>          | ZFMK-TIS-2D100439096 | ZFMK-DNA-0100439768 |
| <i>Mogulones austriacus</i>              | ZFMK-TIS-3481        | ZFMK-DNA-0100449563 |
| <i>Mogulones biondii</i>                 | ZFMK-TIS-2D100447042 | ZFMK-DNA-0100437932 |
| <i>Mogulones cingulatus</i>              | ZFMK-TIS-2D100440315 | ZFMK-DNA-0100438390 |
| <i>Mogulones crucifer</i>                | ZFMK-TIS-20128       | ZFMK-DNA-0100438741 |
| <i>Mogulones cynoglossi</i>              | ZFMK-TIS-3471        | ZFMK-DNA-0100449572 |
| <i>Mogulones dimidiatus</i>              | ZFMK-TIS-3644        | ZFMK-DNA-0155635642 |
| <i>Mogulones geographicus</i>            | ZFMK-TIS-3564        | ZFMK-DNA-0100426049 |
| <i>Mogulones graciosus</i>               | ZFMK-TIS-2D100438691 | ZFMK-DNA-0100438366 |
| <i>Mogulones grisescens</i>              | ZFMK-TIS-2D100438640 | ZFMK-DNA-0100438197 |
| <i>Mogulones larvatus</i>                | ZFMK-TIS-3408        | ZFMK-DNA-0100449636 |
| <i>Mogulones pallidicornis</i>           | ZFMK-TIS-3138        | ZFMK-DNA-0100426871 |
| <i>Mogulones peregrinus</i>              | ZFMK-TIS-3433        | ZFMK-DNA-0100449611 |
| <i>Mogulones pseudopollinarius</i>       | ZFMK-TIS-3060        | ZFMK-DNA-0100448164 |
| <i>Mogulones raphani</i>                 | ZFMK-TIS-20374       | ZFMK-DNA-0100448284 |
| <i>Mogulones soricinus</i>               | ZFMK-TIS-3423        | ZFMK-DNA-0100449620 |
| <i>Mogulones uncipes</i>                 | ZFMK-TIS-3566        | ZFMK-DNA-0100426051 |
| <i>Mogulonoides radula</i>               | ZFMK-TIS-26016       | ZFMK-DNA-0171600661 |
| <i>Neoglocianus albiovittatus</i>        | ZFMK-TIS-20449       | ZFMK-DNA-0100448599 |
| <i>Neoglocianus maculaalba</i>           | ZFMK-TIS-4083        | ZFMK-DNA-0100426435 |
| <i>Oprohinus consputus</i>               | ZFMK-TIS-3464        | ZFMK-DNA-0100449580 |
| <i>Oprohinus suturalis</i>               | ZFMK-TIS-3647        | ZFMK-DNA-0155635630 |
| <i>Parethelcus nescicola</i>             | ZFMK-TIS-3043        | ZFMK-DNA-0155630431 |
| <i>Paroxyonyx audisioi</i>               | ZFMK-TIS-3521        | ZFMK-DNA-0100426102 |

|                                    |                      |                     |
|------------------------------------|----------------------|---------------------|
| <i>Paroxyonyx cinctus</i>          | ZFMK-TIS-3437        | ZFMK-DNA-0100449607 |
| <i>Paroxyonyx fallaciosus</i>      | ZFMK-TIS-3626        | ZFMK-DNA-0155635651 |
| <i>Paroxyonyx imitator</i>         | ZFMK-TIS-3438        | ZFMK-DNA-0100449606 |
| <i>Pelenomus canaliculatus</i>     | ZFMK-TIS-20344       | ZFMK-DNA-0100448421 |
| <i>Pelenomus commari</i>           | ZFMK-TIS-2D100438519 | ZFMK-DNA-0100439798 |
| <i>Pelenomus velaris</i>           | ZFMK-TIS-3811        | ZFMK-DNA-0100449720 |
| <i>Perioxyonyx splendidus</i>      | ZFMK-TIS-3625        | ZFMK-DNA-0155635652 |
| <i>Phrydiuchus quijote</i>         | ZFMK-TIS-3518        | ZFMK-DNA-0100426236 |
| <i>Phrydiuchus topiarius</i>       | ZFMK-TIS-20148       | ZFMK-DNA-0100438728 |
| <i>Phytobius leucogaster</i>       | ZFMK-TIS-20155       | ZFMK-DNA-0100438937 |
| <i>Poophagus sisymbrii</i>         | ZFMK-TIS-3807        | ZFMK-DNA-0100449716 |
| <i>Ranunculiphilus faeculentus</i> | ZFMK-TIS-3472        | ZFMK-DNA-0100449573 |
| <i>Rhinoncus albicinctus</i>       | ZFMK-TIS-3501        | ZFMK-DNA-0155630467 |
| <i>Rhinoncus castor</i>            | ZFMK-TIS-3169        | ZFMK-DNA-0100426948 |
| <i>Rhinoncus henningsi</i>         | ZFMK-TIS-2D100439099 | ZFMK-DNA-0100439771 |
| <i>Rhinoncus inconspicuous</i>     | ZFMK-TIS-20159       | ZFMK-DNA-0100438710 |
| <i>Rhinoncus smreczynskii</i>      | ZFMK-TIS-20113       | ZFMK-DNA-0100438933 |
| <i>Scleropterus serratus</i>       | ZFMK-TIS-20145       | ZFMK-DNA-0155630446 |
| <i>Sirocalodes depressicollis</i>  | ZFMK-TIS-20129       | ZFMK-DNA-0100438958 |
| <i>Sirocalodes mixtus</i>          | ZFMK-TIS-4672        | ZFMK-DNA-0155628558 |
| <i>Sirocalodes nigroterminatus</i> | ZFMK-TIS-3034        | ZFMK-DNA-0100448190 |
| <i>Stenocarus ruficornis</i>       | ZFMK-TIS-3722        | ZFMK-DNA-0100413827 |
| <i>Tapeinotus sellatus</i>         | ZFMK-TIS-20160       | ZFMK-DNA-0100438909 |
| <i>Thamiocolus garajonay</i>       | ZFMK-TIS-4077        | ZFMK-DNA-0171624053 |
| <i>Thamiocolus grancanariensis</i> | ZFMK-TIS-2D100447002 | ZFMK-DNA-0100437934 |
| <i>Thamiocolus niveus</i>          | ZFMK-TIS-4145        | ZFMK-DNA-0100426150 |
| <i>Thamiocolus sinapis</i>         | ZFMK-TIS-2D100440252 | ZFMK-DNA-0100438140 |
| <i>Thamiocolus viduatus</i>        | ZFMK-TIS-20170       | ZFMK-DNA-0100438702 |
| <i>Thamiocolus virgatus</i>        | ZFMK-TIS-3648        | ZFMK-DNA-0155635629 |
| <i>Thamiocolus wollastoni</i>      | ZFMK-TIS-3022        | ZFMK-DNA-0155630428 |
| <i>Trichosirocalus barnevillei</i> | ZFMK-TIS-4181        | ZFMK-DNA-0155628521 |
| <i>Trichosirocalus histrix</i>     | ZFMK-TIS-3416        | ZFMK-DNA-0100449113 |
| <i>Trichosirocalus horridus</i>    | ZFMK-TIS-20151       | ZFMK-DNA-0100438718 |
| <i>Trichosirocalus spurnyi</i>     | ZFMK-TIS-20166       | ZFMK-DNA-0100438698 |
| <i>Trichosirocalus thalhammeri</i> | ZFMK-TIS-3454        | ZFMK-DNA-0100449590 |
| <i>Trichosirocalus troglodytes</i> | ZFMK-TIS-3710        | ZFMK-DNA-0100413785 |
| <i>Zacladus exiguus</i>            | ZFMK-TIS-3853        | ZFMK-DNA-0100449666 |
| <i>Zacladus geranii</i>            | ZFMK-TIS-20326       | ZFMK-DNA-0100448438 |

**Table S3:** Host plant associations of all included ceutorhynchine weevils.

| <b>Tribus/Species</b>                    | <b>Host plant</b>                                                           | <b>Order</b>    | <b>Reference</b>            |
|------------------------------------------|-----------------------------------------------------------------------------|-----------------|-----------------------------|
| <b>Mononychini</b>                       |                                                                             |                 |                             |
| <i>Mononychus punctumalbum</i>           | <i>Iris</i> spp                                                             | Iridaceae       | Rheinheimer & Hassler, 2010 |
| <b>Amalini</b>                           |                                                                             |                 |                             |
| <i>Amalus scortillum</i>                 | <i>Polygonum aviculare</i>                                                  | Polygonaceae    | Rheinheimer & Hassler, 2010 |
| <b>Hypurini</b>                          |                                                                             |                 |                             |
| <i>Aphytobius sphaerion</i>              | <i>Silene alba</i> , <i>Arenaria</i> spp                                    | Caryophyllaceae | Colonnelli, 2004            |
| <i>Aphytobius veronicae</i>              | <i>Silene latifolia</i>                                                     | Caryophyllaceae | Krátký, 2015                |
| <b>Phytobiini</b>                        |                                                                             |                 |                             |
| <i>Eubrychius velutus</i>                | <i>Myriophyllum</i> spp                                                     | Haloragaceae    | Colonnelli, 2004            |
| <i>Euhrychiopsis lecontei</i>            | <i>Myriophyllum</i> spp                                                     | Haloragaceae    | Colonnelli, 2004            |
| <i>Pelenomus canaliculatus</i>           | <i>Myriophyllum</i> spp                                                     | Haloragaceae    | Rheinheimer & Hassler, 2010 |
| <i>Pelenomus commari</i>                 | <i>Sanguisorba officinalis</i> , <i>Potentilla</i> sp, <i>Alchemilla</i> sp | Rosaceae        | Rheinheimer & Hassler, 2010 |
| <i>Pelenomus quadrituberculatus</i>      | <i>Persicaria</i> spp, <i>Fallopia convolvulus</i> , <i>Polygonum</i> spp   | Polygonaceae    | Rheinheimer & Hassler, 2010 |
| <i>Pelenomus velaris</i>                 | <i>Persicaria amphibia</i>                                                  | Polygonaceae    | Rheinheimer & Hassler, 2010 |
| <i>Phytobius leucogaster</i>             | <i>Myriophyllum</i> spp                                                     | Haloragaceae    | Rheinheimer & Hassler, 2010 |
| <i>Neophytobius granatus</i>             | <i>Persicaria lapathifolia</i>                                              | Polygonaceae    | Rheinheimer & Hassler, 2010 |
| <i>Rhinoncus albicinctus</i>             | <i>Persicaria amphibia</i>                                                  | Polygonaceae    | Rheinheimer & Hassler, 2010 |
| <i>Rhinoncus bruchoides</i>              | <i>Persicaria</i> spp                                                       | Polygonaceae    | Rheinheimer & Hassler, 2010 |
| <i>Rhinoncus castor</i>                  | <i>Rumex acetosella</i>                                                     | Polygonaceae    | Rheinheimer & Hassler, 2010 |
| <i>Rhinoncus henningsi</i>               | <i>Persicaria bistorta</i>                                                  | Polygonaceae    | Rheinheimer & Hassler, 2010 |
| <i>Rhinoncus inconspicuous</i>           | <i>Persicaria amphibia</i>                                                  | Polygonaceae    | Rheinheimer & Hassler, 2010 |
| <i>Rhinoncus pericarpus</i>              | <i>Rumex</i> spp                                                            | Polygonaceae    | Rheinheimer & Hassler, 2010 |
| <i>Rhinoncus perpendiculatus</i>         | <i>Persicaria</i> spp                                                       | Polygonaceae    | Rheinheimer & Hassler, 2010 |
| <i>Marmaropus besseri</i>                | <i>Rumex thyrsoiflorus</i>                                                  | Polygonaceae    | Rheinheimer & Hassler, 2010 |
| <b>Scleropterini</b>                     |                                                                             |                 |                             |
| <i>Rutidosoma globulus</i>               | <i>Populus</i> spp                                                          | Salicaceae      | Rheinheimer & Hassler, 2010 |
| <i>Scleropteridius cf globulus</i>       | <i>Oxalis acetosella</i>                                                    | Oxalidaceae     | Rheinheimer & Hassler, 2010 |
| <i>Scleropterus serratus</i>             | <i>Geum rivale</i>                                                          | Rosaceae        | Rheinheimer & Hassler, 2010 |
| <i>Scleropterides hypocrita</i>          | <i>Rubus matsumuranus</i>                                                   | Rosaceae        | Rheinheimer & Hassler, 2010 |
| <i>Tapeinotus sellatus</i>               | <i>Lysimachia vulgaris</i> , <i>L. thyrsoiflora</i>                         | Myrsinaceae     | Colonnelli, 2004            |
| <i>Brachiodontus reitteri</i>            | host unknown                                                                | Primulaceae?    | Colonnelli, 2004            |
| <i>Homorosoma validirostre</i>           | <i>Polygonum</i> spp                                                        | Polygonaceae    | Colonnelli, 2004            |
| <b>Mecysmoderini</b>                     |                                                                             |                 |                             |
| <i>Xenysmoderes consularis</i>           | <i>Alpinia</i> sp                                                           | Zingiberaceae   | Colonnelli, 2004            |
| <i>Coelioderes nigrinus</i>              | <i>Rhododendron mucronulatum</i>                                            | Ericaceae       | Colonnelli, 2004            |
| <b>Egriini</b>                           |                                                                             |                 |                             |
| <i>Cyphosenus grouvellei</i>             | <i>Rhododendron</i> sp                                                      | Ericaceae       | Hong et al., 2011           |
| <i>Ceutorhynchoides styracis</i>         | <i>Styrax japonica</i>                                                      | Styracaceae     | Hong et al., 2011           |
| <b>Cnemogonini</b>                       |                                                                             |                 |                             |
| <i>Cnemogonus</i> sp                     | host unknown                                                                | Onagraceae?     | Korotyaev & Anderson, 2002  |
| <i>Auleutes epilobii</i>                 | <i>Epilobium angustiolium</i>                                               | Onagraceae      | Rheinheimer & Hassler, 2010 |
| <i>Parauleutes nebulosus</i>             | host unknown, occasionally on <i>Polygonum</i> spp                          | Polygonaceae    | Colonnelli, 2004            |
| <b>Coeliadini</b>                        |                                                                             |                 |                             |
| <i>Coeliodes dryados</i>                 | <i>Quercus</i> spp                                                          | Fagaceae        | Colonnelli, 2004            |
| <i>Coeliodes nakanoensis</i>             | <i>Quercus dentata</i>                                                      | Fagaceae        | Colonnelli, 2004            |
| <i>Coeliodes rana</i>                    | <i>Quercus</i> spp                                                          | Fagaceae        | Rheinheimer & Hassler, 2010 |
| <i>Coeliodes ruber</i>                   | <i>Quercus</i> spp                                                          | Fagaceae        | Rheinheimer & Hassler, 2010 |
| <i>Coeliodes transversealbofasciatus</i> | <i>Quercus</i> spp                                                          | Fagaceae        | Rheinheimer & Hassler, 2010 |
| <i>Coeliodin rubicundus</i>              | <i>Betula</i> spp                                                           | Betulaceae      | Rheinheimer & Hassler, 2010 |
| <i>Trichocoeliodes excavatus</i>         | <i>Hydrangea serrata</i>                                                    | Fagaceae        | Hong et al., 2011           |
| <b>Oxyonychini</b>                       |                                                                             |                 |                             |
| <i>Barioxyonyx kerzhneri</i>             | <i>Ephedra foemina</i>                                                      | Ephedraceae     | Colonnelli, 2004            |
| <i>Barioxyonyx tournieri</i>             | <i>Ephedra altissima</i> , <i>E. major</i>                                  | Ephedraceae     | Colonnelli, 2004            |
| <i>Mesoxyonyx sicardi</i>                | <i>Ephedra distachya</i> , <i>E. fragilis</i>                               | Ephedraceae     | Colonnelli, 2004            |
| <i>Paroxyonyx audisioi</i>               | <i>Ephedra</i> sp                                                           | Ephedraceae     | Colonnelli, 2004            |
| <i>Paroxyonyx cinctus</i>                | <i>Ephedra alata</i> , <i>E. altissima</i> , <i>E. fragilis</i>             | Ephedraceae     | Colonnelli, 2004            |
| <i>Paroxyonyx fallaciosus</i>            | <i>Ephedra fragilis</i>                                                     | Ephedraceae     | Colonnelli, 2004            |
| <i>Paroxyonyx imitator</i>               | <i>Ephedra major</i> , <i>E. vulgaris</i>                                   | Ephedraceae     | Colonnelli, 2004            |

| <b>Tribus/Species</b>              | <b>Host plant</b>                                                                                              | <b>Order</b>                | <b>Reference</b>            |
|------------------------------------|----------------------------------------------------------------------------------------------------------------|-----------------------------|-----------------------------|
| <i>Paroxyonyx petrae</i>           | <i>Ephedra alata, E. foemina</i>                                                                               | Ephedraceae                 | Colonnelli, 2004            |
| <i>Paroxyonyx rectus</i>           | <i>Ephedra</i> sp                                                                                              | Ephedraceae                 | Colonnelli, 2004            |
| <i>Paroxyonyx</i> sp               | <i>Ephedra</i> sp                                                                                              | Ephedraceae                 | Colonnelli, 2004            |
| <b>Ceutorhynchini</b>              |                                                                                                                |                             |                             |
| <i>Amalorrhynchus melanarius</i>   | <i>Nasturtium officinale</i>                                                                                   | Brassicaceae                | Colonnelli, 2004            |
| <i>Ceutorhynchus aeneicollis</i>   | <i>Lepidium</i> spp, <i>Descurainia sophia, Sysimbrium altissimum</i>                                          | Brassicaceae                | Rheinheimer & Hassler, 2010 |
| <i>Ceutorhynchus alliariae</i>     | <i>Alliaria petiolata</i>                                                                                      | Brassicaceae                | Rheinheimer & Hassler, 2010 |
| <i>Ceutorhynchus alyssi</i>        | <i>Alyssum spinosum</i>                                                                                        | Brassicaceae                | Colonnelli, 2004            |
| <i>Ceutorhynchus arator</i>        | <i>Crambe tataria</i>                                                                                          | Brassicaceae                | Colonnelli, 2004            |
| <i>Ceutorhynchus assimilis</i>     | various crucifers                                                                                              | Brassicaceae,<br>Resedaceae | Rheinheimer & Hassler, 2010 |
| <i>Ceutorhynchus atomus</i>        | <i>Arabidopsis thaliana, Teesdalia nudicaulis, Draba muralis</i>                                               | Brassicaceae                | Rheinheimer & Hassler, 2010 |
| <i>Ceutorhynchus barbarae</i>      | <i>Barbarea</i> ssp, <i>Rorippa palustris, Cardamine enneaphyllos</i>                                          | Brassicaceae                | Rheinheimer & Hassler, 2010 |
| <i>Ceutorhynchus canariensis</i>   | <i>Erucastrum cardaminoides, Descurainia millefolia</i>                                                        | Brassicaceae                | Colonnelli, 2004            |
| <i>Ceutorhynchus carinatus</i>     | <i>Lepidium campestre, Thlaspi</i> spp, <i>Berteroa incana, Isatis tinctoria, Erysimum</i>                     | Brassicaceae,<br>Resedaceae | Rheinheimer & Hassler, 2010 |
| <i>Ceutorhynchus chalybaeus</i>    | <i>Thlaspi arvense, Capsella bursa-pastoris, Reseda luteola</i>                                                | Brassicaceae                | Rheinheimer & Hassler, 2010 |
| <i>Ceutorhynchus chlorophanus</i>  | <i>Erysimum, occasionally on Syrenia siliculata</i>                                                            | Brassicaceae,               | Colonnelli, 2004            |
| <i>Ceutorhynchus cochleriae</i>    | <i>Cardamine pratense, C. amara, Dentaria enneaphyllos</i>                                                     | Brassicaceae                | Colonnelli, 2004            |
| <i>Ceutorhynchus coerulescens</i>  | <i>Lepidium campestre</i>                                                                                      | Brassicaceae                | Colonnelli, 2004            |
| <i>Ceutorhynchus constrictus</i>   | <i>Alliaria petiolata</i>                                                                                      | Brassicaceae                | Rheinheimer & Hassler, 2010 |
| <i>Ceutorhynchus contractus</i>    | various crucifers                                                                                              | Brassicaceae,<br>Resedaceae | Rheinheimer & Hassler, 2010 |
| <i>Ceutorhynchus dubius</i>        | <i>Berteroa incana</i>                                                                                         | Brassicaceae                | Colonnelli, 2004            |
| <i>Ceutorhynchus erysimi</i>       | <i>Capsella bursa-pastoris</i>                                                                                 | Brassicaceae                | Colonnelli, 2004            |
| <i>Ceutorhynchus fallax</i>        | various crucifers                                                                                              | Brassicaceae                | Colonnelli, 2004            |
| <i>Ceutorhynchus filirostris</i>   | <i>Cardamine</i> spp                                                                                           | Brassicaceae                | Rheinheimer & Hassler, 2010 |
| <i>Ceutorhynchus gallorhenanus</i> | various crucifers                                                                                              | Brassicaceae                | Rheinheimer & Hassler, 2010 |
| <i>Ceutorhynchus granulicollis</i> | <i>Thlaspi arvense</i>                                                                                         | Brassicaceae                | Rheinheimer & Hassler, 2010 |
| <i>Ceutorhynchus hampei</i>        | <i>Berteroa incana</i>                                                                                         | Brassicaceae                | Rheinheimer & Hassler, 2010 |
| <i>Ceutorhynchus hirtulus</i>      | <i>Arabidopsis thaliana, Erophila verna</i>                                                                    | Brassicaceae                | Rheinheimer & Hassler, 2010 |
| <i>Ceutorhynchus ignitus</i>       | <i>Berteroa incana</i>                                                                                         | Brassicaceae                | Colonnelli, 2004            |
| <i>Ceutorhynchus inaeffectatus</i> | <i>Hesperis matronalis, H. tristis</i>                                                                         | Brassicaceae                | Rheinheimer & Hassler, 2010 |
| <i>Ceutorhynchus intersetosus</i>  | <i>Diplotaxis, Raphanus rostratus, Sisymbrium irio</i>                                                         | Brassicaceae                | Colonnelli, 2004            |
| <i>Ceutorhynchus jucundus</i>      | <i>Erysimum bicolor?</i>                                                                                       | Brassicaceae                | Stüben, 2017                |
| <i>Ceutorhynchus leprieuri</i>     | <i>Brassica, Alyssum, Rapsitrum, Sinapis</i>                                                                   | Brassicaceae                | Colonnelli, 2004            |
| <i>Ceutorhynchus leucorrhama</i>   | <i>Diplotaxis eruroides</i>                                                                                    | Brassicaceae                | Colonnelli, 2004            |
| <i>Ceutorhynchus libertorum</i>    | <i>Alyssum</i> ssp                                                                                             | Brassicaceae                | Colonnelli, 2005            |
| <i>Ceutorhynchus liliputanus</i>   | <i>Alyssum lenense</i>                                                                                         | Brassicaceae                | Colonnelli, 2004            |
| <i>Ceutorhynchus lukesi</i>        | <i>Alyssum</i> ssp                                                                                             | Brassicaceae                | Colonnelli, 2004            |
| <i>Ceutorhynchus merkli</i>        | <i>Cardaria alba</i>                                                                                           | Brassicaceae                | Colonnelli, 2004            |
| <i>Ceutorhynchus moraviensis</i>   | <i>Sisymbrium strictissimum</i>                                                                                | Brassicaceae                | Colonnelli, 2004            |
| <i>Ceutorhynchus napi</i>          | <i>Brassica, Sisymbrium, Cardaria, Descurainia, Alliaria, Rorippa, Capsella, Erysium, Nasturtium, Sinapsis</i> | Brassicaceae                | Rheinheimer & Hassler, 2010 |
| <i>Ceutorhynchus neglectus</i>     | <i>Descurainia sophia, u.a.</i>                                                                                | Brassicaceae                | Rheinheimer & Hassler, 2010 |
| <i>Ceutorhynchus nevadensis</i>    | <i>Reseda</i> spp                                                                                              | Resedaceae                  | Colonnelli, 2004            |
| <i>Ceutorhynchus niyazii</i>       | <i>Sisymbrium altissimum</i>                                                                                   | Brassicaceae                | Rheinheimer & Hassler, 2010 |
| <i>Ceutorhynchus obstructus</i>    | various crucifers                                                                                              | Brassicaceae                | Rheinheimer & Hassler, 2010 |
| <i>Ceutorhynchus pallidactylus</i> | various crucifers                                                                                              | Brassicaceae,<br>Resedaceae | Rheinheimer & Hassler, 2010 |

| Tribus/Species                      | Host plant                                                                                                      | Order        | Reference                    |
|-------------------------------------|-----------------------------------------------------------------------------------------------------------------|--------------|------------------------------|
| <i>Ceutorhynchus paroliniae</i>     | <i>Parolinia platypetala</i>                                                                                    | Brassicaceae | Krátký, 2016                 |
| <i>Ceutorhynchus parvulus</i>       | <i>Lepidium campestre</i> , <i>L. heterophyllum</i>                                                             | Brassicaceae | Rheinheimer & Hassler, 2010  |
| <i>Ceutorhynchus pectoralis</i>     | <i>Cardamine</i> spp, <i>Barbarea vulgaris</i> , <i>Rorippa</i> spp, <i>Nasturtium officinale</i>               | Brassicaceae | Rheinheimer & Hassler, 2010  |
| <i>Ceutorhynchus pervicax</i>       | <i>Cardamine</i> spp, <i>Nasturtium officinale</i>                                                              | Brassicaceae | Rheinheimer & Hassler, 2010  |
| <i>Ceutorhynchus picitarsis</i>     | <i>Sisymbrium</i> spp, <i>Brassica</i> spp, <i>Erysimum</i>                                                     | Brassicaceae | Rheinheimer & Hassler, 2010  |
| <i>Ceutorhynchus pulvinatus</i>     | <i>Descurainia sophia</i> , <i>Sisymbrium</i> spp                                                               | Brassicaceae | Rheinheimer & Hassler, 2010  |
| <i>Ceutorhynchus pumilio</i>        | <i>Teesdalia nudicaulis</i>                                                                                     | Brassicaceae | Rheinheimer & Hassler, 2010  |
| <i>Ceutorhynchus puncticollis</i>   | <i>Berteroa incana</i> , <i>Erysimum</i> spp                                                                    | Brassicaceae | Rheinheimer & Hassler, 2010  |
| <i>Ceutorhynchus pyrrhorhynchus</i> | <i>Sisymbrium</i> spp                                                                                           | Brassicaceae | Rheinheimer & Hassler, 2010  |
| <i>Ceutorhynchus querceti</i>       | <i>Rorippa palustris</i>                                                                                        | Brassicaceae | Rheinheimer & Hassler, 2010  |
| <i>Ceutorhynchus rapae</i>          | <i>Descurainia sophia</i> , <i>Brassica oleracea</i> , <i>Erysimum cheiranthoides</i> , <i>Cardamine armara</i> | Brassicaceae | Rheinheimer & Hassler, 2010  |
| <i>Ceutorhynchus resedae</i>        | <i>Reseda luteola</i>                                                                                           | Resedaceae   | Rheinheimer & Hassler, 2010  |
| <i>Ceutorhynchus rhenanus</i>       | <i>Erysimum</i> spp                                                                                             | Brassicaceae | Rheinheimer & Hassler, 2010  |
| <i>Ceutorhynchus roberti</i>        | <i>Alliaria petiolata</i>                                                                                       | Brassicaceae | Rheinheimer & Hassler, 2010  |
| <i>Ceutorhynchus sardeanensis</i>   | various crucifers                                                                                               | Brassicaceae | Colonnelli, 2004             |
| <i>Ceutorhynchus scrobicollis</i>   | <i>Alliaria petiolata</i>                                                                                       | Brassicaceae | Rheinheimer & Hassler, 2010  |
| <i>Ceutorhynchus sisymbrii</i>      | <i>Sisymbrium loeselii</i>                                                                                      | Brassicaceae | Colonnelli, 2004             |
| <i>Ceutorhynchus squamulosus</i>    | <i>Brassica barrelieri</i> , <i>Rhynchospinapis hispida</i>                                                     | Brassicaceae | Colonnelli, 2004             |
| <i>Ceutorhynchus striatellus</i>    | <i>Alyssum montanum</i> , <i>A. alpestre</i> , <i>A. alyssoides</i>                                             | Brassicaceae | Rheinheimer & Hassler, 2010  |
| <i>Ceutorhynchus subpubescens</i>   | <i>Descurainia sophia</i>                                                                                       | Brassicaceae | Rheinheimer & Hassler, 2010  |
| <i>Ceutorhynchus sulcatus</i>       | <i>Berteroa</i> , <i>Cardamine</i> , <i>Nasturtium</i> , <i>Sinapis</i>                                         | Brassicaceae | Colonnelli, 2004             |
| <i>Ceutorhynchus sulcicollis</i>    | various crucifers                                                                                               | Brassicaceae | Colonnelli, 2004             |
| <i>Ceutorhynchus syrites</i>        | <i>Camelina sativa</i> , <i>C. microcarpa</i>                                                                   | Brassicaceae | Rheinheimer & Hassler, 2010  |
| <i>Ceutorhynchus tangerianus</i>    | <i>Sinapis alba</i>                                                                                             | Brassicaceae | Colonnelli, 2004             |
| <i>Ceutorhynchus thomsoni</i>       | <i>Alliaria petiolata</i> , <i>Berteroa incana</i> , <i>Brassica campestris</i>                                 | Brassicaceae | Colonnelli, 2004             |
| <i>Ceutorhynchus tibialis</i>       | <i>Diplotaxis</i> , occasionally on <i>Hirschfeldia</i> and <i>Sinapis</i>                                      | Brassicaceae | Colonnelli, 2004             |
| <i>Ceutorhynchus turbatus</i>       | <i>Cardaria draba</i>                                                                                           | Brassicaceae | Rheinheimer & Hassler, 2010  |
| <i>Ceutorhynchus typhae</i>         | various crucifers                                                                                               | Brassicaceae | Rheinheimer & Hassler, 2010  |
| <i>Ceutorhynchus varius</i>         | <i>Arabidopsis thaliana</i>                                                                                     | Brassicaceae | Colonnelli, 2004             |
| <i>Ceutorhynchus wagneri</i>        | <i>Alyssum calycinum</i>                                                                                        | Brassicaceae | Colonnelli, 2004             |
| <i>Coeliastes lamii</i>             | <i>Lamium</i> spp, <i>Galeopsis tetrahit</i>                                                                    | Lamiaceae    | Rheinheimer & Hassler, 2010  |
| <i>Datonychidius tener</i>          | <i>Marrubium cylleneum</i>                                                                                      | Lamiaceae    | Colonnelli, 2004             |
| <i>Datonychus delicatulus</i>       | host unknown                                                                                                    | Lamiaceae?   | Colonnelli, 2004             |
| <i>Datonychus maurus</i>            | <i>Mentha</i> spp                                                                                               | Lamiaceae    | Colonnelli, 2004             |
| <i>Datonychus melanostictus</i>     | <i>Mentha</i> spp, <i>Lycopus europeus</i>                                                                      | Lamiaceae    | Colonnelli, 2004             |
| <i>Datonychus paszlavszkyi</i>      | <i>Salvia nemorosa</i> , <i>S. pratensis</i>                                                                    | Lamiaceae    | Colonnelli, 2004             |
| <i>Drupenatus nasturtii</i>         | <i>Nasturtium officinale</i>                                                                                    | Brassicaceae | Rheinheimer & Hassler, 2010  |
| <i>Glocianus distinctus</i>         | <i>Hypochaeris</i> , <i>Crepis</i> , <i>Lactua</i> , <i>Hieracium</i>                                           | Asteraceae   | Rheinheimer & Hassler, 2010  |
| <i>Glocianus fennicus</i>           | <i>Taraxacum officinale</i> , <i>Leontodon autumnale</i> , <i>Senecio integrifolius</i>                         | Asteraceae   | Colonnelli, 2004             |
| <i>Glocianus granulithorax</i>      | host unknown                                                                                                    | Asteraceae?  | Colonnelli, 2004             |
| <i>Glocianus punctiger</i>          | <i>Taraxacum</i> spp                                                                                            | Asteraceae   | Rheinheimer & Hassler, 2010  |
| <i>Hadroplontus ancora</i>          | host unknown                                                                                                    | Asteraceae?  | Colonnelli, 2004             |
| <i>Hadroplontus litura</i>          | <i>Cirsium</i> spp, <i>Carduus</i> spp                                                                          | Asteraceae   | Rheinheimer & Hassler, 2010  |
| <i>Hadroplontus trimaculatus</i>    | <i>Cirsium arvense</i> , <i>Cirsium</i> spp, <i>Carduus defloratus</i>                                          | Asteraceae   | Rheinheimer & Hassler, 2010  |
| <i>Hainokisaruzo japonicus</i>      | <i>Symplocos glauca</i>                                                                                         | Symplocaceae | Yoshitake & Colonnelli, 2005 |
| <i>Hesperorrhynchus hesperus</i>    | <i>Aichryson laxum</i> , <i>A. parlatorei</i> , <i>A. punctatum</i>                                             | Crassulaceae | Colonnelli, 2004             |

| Tribus/Species                       | Host plant                                                                 | Order         | Reference                            |
|--------------------------------------|----------------------------------------------------------------------------|---------------|--------------------------------------|
| <i>Hesperorrhynchus phytobioides</i> | <i>Aichryson laxum, A. punctatum</i>                                       | Crassulaceae  | Colonnelli, 2004                     |
| <i>Hesperorrhynchus incautus</i>     | <i>Monanthes laxiflora</i>                                                 | Crassulaceae  | Colonnelli, 2004                     |
| <i>Micrelus ericae</i>               | <i>Calluna vulgaris</i>                                                    | Ericaceae     | Rheinheimer & Hassler, 2010          |
| <i>Micrelus ferrugatus</i>           | <i>Erica arborea, E. scoparia</i>                                          | Ericaceae     | Colonnelli, 2004                     |
| <i>Microplontus campestris</i>       | <i>Leucantheum spp</i>                                                     | Asteraceae    | Rheinheimer & Hassler, 2010          |
| <i>Microplontus melanostigma</i>     | <i>Tripleurospermum perforatum,</i><br><i>Matricaria spp, Anthemis spp</i> | Asteraceae    | Rheinheimer & Hassler, 2010          |
| <i>Microplontus millefolii</i>       | <i>Tanacetum vulgare</i>                                                   | Asteraceae    | Rheinheimer & Hassler, 2010          |
| <i>Microplontus rugulosus</i>        | <i>Artemisia spp, Tripleurospermum perforatum</i>                          | Asteraceae    | Rheinheimer & Hassler, 2010          |
| <i>Mogulones abbreviatulus</i>       | <i>Symphytum officinale</i>                                                | Boraginaceae  | Rheinheimer & Hassler, 2010          |
| <i>Mogulones asperifoliarum</i>      | various                                                                    | Boraginaceae  | Colonnelli, 2004                     |
| <i>Mogulones austriacus</i>          | <i>Nonea lutea, N. pulla</i>                                               | Boraginaceae  | Colonnelli, 2004                     |
| <i>Mogulones biondii</i>             | <i>Echium spp</i>                                                          | Boraginaceae  | Colonnelli, 2004                     |
| <i>Mogulones cingulatus</i>          | <i>Cynoglossum pictum, Nonea, Onosma stellutatum</i>                       | Boraginaceae  | Colonnelli, 2004                     |
| <i>Mogulones crucifer</i>            | <i>Cynoglossum officinale, Anchusa arvensis</i>                            | Boraginaceae  | Rheinheimer & Hassler, 2010          |
| <i>Mogulones cynoglossi</i>          | <i>Cynoglossum officinale</i>                                              | Boraginaceae  | Colonnelli, 2004                     |
| <i>Mogulones dimidiatus</i>          | <i>Nonea pulla</i>                                                         | Boraginaceae  | Colonnelli, 2004                     |
| <i>Mogulones geographicus</i>        | <i>Echium spp</i>                                                          | Boraginaceae  | Rheinheimer & Hassler, 2010          |
| <i>Mogulones graciosus</i>           | <i>Anchusa italica</i>                                                     | Boraginaceae  | Colonnelli, 2004                     |
| <i>Mogulones grisescens</i>          | <i>Echium arenarium, E. creticum</i>                                       | Boraginaceae  | Colonnelli, 2004                     |
| <i>Mogulones larvatus</i>            | <i>Pulmonaria spp, Echinum spp</i>                                         | Boraginaceae  | Rheinheimer & Hassler, 2010          |
| <i>Mogulones pallidicornis</i>       | <i>Pulmonaria spp</i>                                                      | Boraginaceae  | Rheinheimer & Hassler, 2010          |
| <i>Mogulones peregrinus</i>          | <i>Borago officinalis, occasionally on Cerinthe major</i>                  | Boraginaceae  | Colonnelli, 2004                     |
| <i>Mogulones pseudopollinarius</i>   | <i>Echium plantagineum</i>                                                 | Boraginaceae  | Colonnelli, 2004                     |
| <i>Mogulones raphani</i>             | <i>Symphytum officinale</i>                                                | Boraginaceae  | Rheinheimer & Hassler, 2010          |
| <i>Mogulones soricinus</i>           | <i>Nonea nigricans</i>                                                     | Boraginaceae  | Colonnelli, 2004                     |
| <i>Mogulones uncipes</i>             | host unknown                                                               | Boraginaceae? | Colonnelli, 2004                     |
| <i>Mogulonoides radula</i>           | <i>Anchusa officinalis</i>                                                 | Boraginaceae  | Colonnelli, 2004                     |
| <i>Nedyus quadrimaculatus</i>        | <i>Urtica dioica</i>                                                       | Urticaceae    | Rheinheimer & Hassler, 2010          |
| <i>Neoglocianus albovittatus</i>     | <i>Papaver spp</i>                                                         | Papaveraceae  | Rheinheimer & Hassler, 2010          |
| <i>Neoglocianus maculaalba</i>       | <i>Papaver spp</i>                                                         | Papaveraceae  | Rheinheimer & Hassler, 2010          |
| <i>Oprohinus consputus</i>           | <i>Allium spp</i>                                                          | Alliaceae     | Rheinheimer & Hassler, 2010          |
| <i>Oprohinus suturalis</i>           | <i>Allium spp</i>                                                          | Alliaceae     | Rheinheimer & Hassler, 2010          |
| <i>Parethelcus nesicola</i>          | <i>Urtica urens</i>                                                        | Urticaceae    | Colonnelli, 2004                     |
| <i>Parethelcus pollinarius</i>       | <i>Urtica dioica, U. pilulifera</i>                                        | Urticaceae    | Colonnelli, 2004                     |
| <i>Phrydiuchus augusti</i>           | <i>Salvia nemorosa</i>                                                     | Lamiaceae     | Colonnelli, 2004                     |
| <i>Phrydiuchus quijote</i>           | <i>Salvia spp</i>                                                          | Lamiaceae     | San Vicente & Salgueira Cerezo, 2010 |
| <i>Phrydiuchus tau</i>               | <i>Salvia aethiopsis, S. verticillata</i>                                  | Lamiaceae     | Colonnelli, 2004                     |
| <i>Phrydiuchus topiarius</i>         | <i>Salvia pratensis</i>                                                    | Lamiaceae     | Rheinheimer & Hassler, 2010          |
| <i>Poophagus sisymbrii</i>           | <i>Nasturtium officinale, Rorippa spp</i>                                  | Brassicaceae  | Rheinheimer & Hassler, 2010          |
| <i>Ranunculiphilus faeculentus</i>   | <i>Consolida arvensis, C. orientalis, C. regalis</i>                       | Ranunculaceae | Rheinheimer & Hassler, 2011          |
| <i>Sirocalodes depressicollis</i>    | <i>Fumaria officinalis, F. vaillantii, Pseudofumaria lutea</i>             | Fumariaceae   | Rheinheimer & Hassler, 2012          |
| <i>Sirocalodes mixtus</i>            | <i>Fumaria spp</i>                                                         | Fumariaceae   | Colonnelli, 2004                     |
| <i>Sirocalodes nigroterminatus</i>   | <i>Ceratocarpus claviculata</i>                                            | Fumariaceae   | Rheinheimer & Hassler, 2010          |
| <i>Sirocalodes umbrinus</i>          | <i>Corydalis speciosa</i>                                                  | Fumariaceae   | Colonnelli, 2004                     |
| <i>Stenocarus cardui</i>             | <i>Papaver spp</i>                                                         | Papaveraceae  | Rheinheimer & Hassler, 2010          |
| <i>Stenocarus ruficornis</i>         | <i>Papaver spp</i>                                                         | Papaveraceae  | Rheinheimer & Hassler, 2010          |
| <i>Thamiocolus garajonay</i>         | <i>Sideritis spp</i>                                                       | Lamiaceae     | Stüben & Schütte, 2014               |
| <i>Thamiocolus grancanariensis</i>   | <i>Sideritis dasygnaphala</i>                                              | Lamiaceae     | Stüben & Schütte, 2014               |
| <i>Thamiocolus kraatzi</i>           | <i>Stachys palustris, S. sylvatica</i>                                     | Lamiaceae     | Colonnelli, 2004                     |
| <i>Thamiocolus niveus</i>            | <i>Ballota nigra</i>                                                       | Lamiaceae     | Colonnelli, 2004                     |
| <i>Thamiocolus signatus</i>          | <i>Stachys recta, S. atherocalyx</i>                                       | Lamiaceae     | Colonnelli, 2004                     |
| <i>Thamiocolus sinapis</i>           | <i>Lamium album, Stachys mialhesi, S. recta, S. atherocalyx</i>            | Lamiaceae     | Colonnelli, 2004                     |
| <i>Thamiocolus viduatus</i>          | <i>Stachys palustris</i>                                                   | Lamiaceae     | Rheinheimer & Hassler, 2010          |
| <i>Thamiocolus virgatus</i>          | <i>Phlomis tuberosa</i>                                                    | Lamiaceae     | Colonnelli, 2004                     |



| <b>Tribus/Species</b>              | <b>Host plant</b>                              | <b>Order</b>   | <b>Reference</b>            |
|------------------------------------|------------------------------------------------|----------------|-----------------------------|
| <i>Thamiocolus wollastoni</i>      | <i>Sideritis</i>                               | Lamiaceae      | Colonnelli, 2004            |
| <i>Trichosirocalus barnevillei</i> | <i>Anthemis millefolium</i>                    | Asteraceae     | Rheinheimer & Hassler, 2010 |
| <i>Trichosirocalus histrix</i>     | <i>Anthemis mixta</i>                          | Asteraceae     | Colonnelli, 2004            |
| <i>Trichosirocalus horridus</i>    | <i>Cirsium</i> spp, <i>Carduus</i> spp         | Asteraceae     | Rheinheimer & Hassler, 2010 |
| <i>Trichosirocalus spurnyi</i>     | <i>Anthemis millefolium</i>                    | Asteraceae     | Rheinheimer & Hassler, 2010 |
| <i>Trichosirocalus thalhammeri</i> | <i>Plantago coronopus</i> , <i>P. maritima</i> | Asteraceae     | Colonnelli, 2004            |
| <i>Trichosirocalus troglodytes</i> | <i>Plantago lanceolata</i>                     | Plantaginaceae | Rheinheimer & Hassler, 2010 |
| <i>Zacladus exiguus</i>            | <i>Geranium</i> spp                            | Geranicaceae   | Rheinheimer & Hassler, 2010 |
| <i>Zacladus geranii</i>            | <i>Geranium</i> spp                            | Geranicaceae   | Rheinheimer & Hassler, 2010 |
| <i>Wagnerinus costatus</i>         | <i>Weigela hortensis</i>                       | Caprifoliaceae | Yoshitake et al., 2008      |
| <i>Wagnerinus frugivorus</i>       | <i>Weigela middendorffiana</i>                 | Caprifoliaceae | Yoshitake et al., 2008      |
| <i>Wagnerinus harmandi</i>         | <i>Abelia spathulata</i>                       | Caprifoliaceae | Yoshitake & Ito, 2011       |

**Table S4A:** Results of the character-dependent diversification analysis in HiSSE, based on the BEAST-I analysis. The Akaike Information Criterion corrected for sample size (AICc) was used to estimate differences among all 44 models. Instead of speciation and extinction rate parameters, HiSSE optimizes transformations of these variables: Turnover rate ( $\tau$ ; speciation rate  $\lambda$  + extinction rate  $\mu$ ) and extinction fraction ( $\varepsilon = \mu/\lambda$ ). Number of free parameters (df), log likelihood (LnL), Akaike weights (AICw).

| #         | Model        | Parameter                                                                                                                    | df       | LnL           | AICc          | $\Delta$ AICc | AICw       |
|-----------|--------------|------------------------------------------------------------------------------------------------------------------------------|----------|---------------|---------------|---------------|------------|
| 1         | BiSSE        | All                                                                                                                          | 6        | -824.4        | 1661.3        | 18.7          | 0.0        |
| 2         | BiSSE        | $\varepsilon_0=\varepsilon_1$                                                                                                | 5        | -829.9        | 1670.0        | 27.4          | 0.0        |
| 3         | BiSSE        | q's equal                                                                                                                    | 5        | -839.5        | 1689.2        | 46.6          | 0.0        |
| 4         | BiSSE        | $\varepsilon_0=\varepsilon_1$ , q's equal                                                                                    | 4        | -839.4        | 1687.1        | 44.5          | 0.0        |
| 5         | Null-2       | q's equal                                                                                                                    | 5        | -824.6        | 1659.5        | 16.9          | 0.0        |
| 6         | Null-2       | $\varepsilon$ 's, q's equal                                                                                                  | 3        | -830.1        | 1666.4        | 23.8          | 0.0        |
| 7         | Null-2       | q's diff                                                                                                                     | 8        | -816.6        | 1717.8        | 75.2          | 0.0        |
| 8         | Null-2       | $\varepsilon$ 's, q's diff                                                                                                   | 5        | -815.4        | 1696.5        | 53.9          | 0.0        |
| 9         | Null-4       | q's equal                                                                                                                    | 8        | -816.6        | 1652.2        | 9.6           | 0.0        |
| 10        | Null-4       | $\varepsilon$ 's equal, q's equal                                                                                            | 5        | -815.4        | 1643.2        | 0.7           | 0.3        |
| 11        | Null-4       | q's diff                                                                                                                     | 16       | -811.5        | 1660.3        | 17.7          | 0.0        |
| 12        | Null-4       | $\varepsilon$ 's equal, q's diff                                                                                             | 13       | -812.6        | 1655.5        | 12.9          | 0.0        |
| 13        | HiSSE        | q's equal                                                                                                                    | 9        | -821.4        | 1661.8        | 19.2          | 0.0        |
| 14        | HiSSE        | $\varepsilon$ 's equal, q's equal                                                                                            | 6        | -817.2        | 1646.8        | 4.2           | 0.1        |
| 15        | HiSSE        | $\tau_0A=\tau_1A=\tau_0B$ , $\varepsilon_0A=\varepsilon_1A=\varepsilon_0B$ , q's equal                                       | 5        | -817.5        | 1645.2        | 2.7           | 0.1        |
| 16        | HiSSE        | $\tau_0A=\tau_1A=\tau_0B$ , $\varepsilon$ 's equal, q's equal                                                                | 4        | -824.5        | 1657.3        | 14.7          | 0.0        |
| 17        | HiSSE        | $q_0B_1B=0$ , $q_1B_0B=0$ , all other q's equal                                                                              | 9        | -814.5        | 1647.8        | 5.2           | 0.0        |
| 18        | HiSSE        | $\varepsilon$ 's equal, $q_0B_1B=0$ , $q_1B_0B=0$ , all other q's equal                                                      | 6        | -833.8        | 1680.0        | 37.4          | 0.0        |
| 19        | HiSSE        | $\tau_0A=\tau_1A=\tau_0B$ , $\varepsilon_0A=\varepsilon_1A=\varepsilon_0B$ , $q_0B_1B=0$ , $q_1B_0B=0$ , all other q's equal | 5        | -822.9        | 1656.0        | 13.5          | 0.0        |
| 20        | HiSSE        | $\tau_0A=\tau_1A=\tau_0B$ , $\varepsilon$ 's equal, $q_0B_1B=0$ , $q_1B_0B=0$ , all other q's equal                          | 4        | -845.3        | 1698.8        | 56.2          | 0.0        |
| 21        | HiSSE        | $\tau_0A=\tau_1A$ , $\varepsilon_0A=\varepsilon_1A$ , q's equal                                                              | 7        | -817.4        | 1649.3        | 6.8           | 0.0        |
| <b>22</b> | <b>HiSSE</b> | <b><math>\tau_0A=\tau_1A</math>, <math>\varepsilon</math>'s equal, q's equal</b>                                             | <b>5</b> | <b>-816.1</b> | <b>1642.6</b> | <b>0.0</b>    | <b>0.4</b> |
| 23        | HiSSE        | $\tau_0A=\tau_1A$ , $\varepsilon_0A=\varepsilon_1A$ , $q_0B_1B=0$ , $q_1B_0B=0$ , all other q's equal                        | 7        | -828.9        | 1672.4        | 29.8          | 0.0        |
| 24        | HiSSE        | $\tau_0A=\tau_1A$ , $\varepsilon$ 's equal, $q_0B_1B=0$ , $q_1B_0B=0$ , all other q's equal                                  | 5        | -820.3        | 1650.9        | 8.3           | 0.0        |
| 25        | HiSSE        | $\tau_0A=\tau_0B$ , $\varepsilon_0A=\varepsilon_0B$ , q's equal                                                              | 7        | -817.6        | 1649.8        | 7.2           | 0.0        |
| 26        | HiSSE        | $\tau_0A=\tau_0B$ , $\varepsilon$ 's equal, q's equal                                                                        | 5        | -825.1        | 1660.5        | 17.9          | 0.0        |
| 27        | HiSSE        | $\tau_0A=\tau_0B$ , $\varepsilon_0A=\varepsilon_0B$ , $q_0B_1B=0$ , $q_1B_0B=0$ , all other q's equal                        | 7        | -821.5        | 1657.6        | 15.0          | 0.0        |
| 28        | HiSSE        | $\tau_0A=\tau_0B$ , $\varepsilon$ 's equal, $q_0B_1B=0$ , $q_1B_0B=0$ , all other q's equal                                  | 5        | -831.6        | 1673.5        | 30.9          | 0.0        |
| 29        | HiSSE        | q's diff                                                                                                                     | 16       | -822.7        | 1680.3        | 37.7          | 0.0        |
| 30        | HiSSE        | $\varepsilon$ 's equal, q's diff                                                                                             | 13       | -821.4        | 1670.6        | 28.0          | 0.0        |
| 31        | HiSSE        | $\tau_0A=\tau_1A=\tau_0B$ , $\varepsilon_0A=\varepsilon_1A=\varepsilon_0B$ , q's diff                                        | 12       | -817.9        | 1661.5        | 18.9          | 0.0        |
| 32        | HiSSE        | $\tau_0A=\tau_1A=\tau_0B$ , $\varepsilon$ 's equal, q's diff                                                                 | 11       | -839.2        | 1701.8        | 59.2          | 0.0        |
| 33        | HiSSE        | $q_0B_1B=0$ , $q_1B_0B=0$ , all other q's diff                                                                               | 14       | -811.9        | 1654.1        | 11.5          | 0.0        |
| 34        | HiSSE        | $\varepsilon$ 's equal, $q_0B_1B=0$ , $q_1B_0B=0$ , all other q's diff                                                       | 11       | -815.0        | 1653.4        | 10.8          | 0.0        |
| 35        | HiSSE        | $\tau_0A=\tau_1A=\tau_0B$ , $\varepsilon_0A=\varepsilon_1A=\varepsilon_0B$ , $q_0B_1B=0$ , $q_1B_0B=0$ , all other q's diff  | 10       | -842.3        | 1705.8        | 63.2          | 0.0        |
| 36        | HiSSE        | $\tau_0A=\tau_1A=\tau_0B$ , $\varepsilon$ 's equal, $q_0B_1B=0$ , $q_1B_0B=0$ , all other q's diff                           | 9        | -837.4        | 1693.8        | 51.2          | 0.0        |
| 37        | HiSSE        | $\tau_0A=\tau_1A$ , $\varepsilon_0A=\varepsilon_1A$ , q's diff                                                               | 14       | -824.4        | 1679.0        | 36.4          | 0.0        |
| 38        | HiSSE        | $\tau_0A=\tau_1A$ , $\varepsilon$ 's equal, q's diff                                                                         | 12       | -832.1        | 1689.8        | 47.2          | 0.0        |
| 39        | HiSSE        | $\tau_0A=\tau_1A$ , $\varepsilon_0A=\varepsilon_1A$ , $q_0B_1B=0$ , $q_1B_0B=0$ , all other q's diff                         | 12       | -818.6        | 1662.9        | 20.3          | 0.0        |
| 40        | HiSSE        | $\tau_0A=\tau_1A$ , $\varepsilon$ 's equal, $q_0B_1B=0$ , $q_1B_0B=0$ , all other q's diff                                   | 10       | -814.2        | 1649.6        | 7.0           | 0.0        |
| 41        | HiSSE        | $\tau_0A=\tau_0B$ , $\varepsilon_0A=\varepsilon_0B$ , q's diff                                                               | 14       | -821.8        | 1673.8        | 31.2          | 0.0        |
| 42        | HiSSE        | $\tau_0A=\tau_0B$ , $\varepsilon$ 's equal, q's diff                                                                         | 12       | -841.0        | 1707.7        | 65.1          | 0.0        |
| 43        | HiSSE        | $\tau_0A=\tau_0B$ , $\varepsilon_0A=\varepsilon_0B$ , $q_0B_1B=0$ , $q_1B_0B=0$ , all other q's diff                         | 12       | -822.9        | 1671.4        | 28.8          | 0.0        |
| 44        | HiSSE        | $\tau_0A=\tau_0B$ , $\varepsilon$ 's equal, $q_0B_1B=0$ , $q_1B_0B=0$ , all other q's diff                                   | 10       | -836.4        | 1694.0        | 51.4          | 0.0        |

**Table S4B:** Results of the character-dependent diversification analysis in HiSSE, based on the BEAST-III analysis. The Akaike Information Criterion corrected for sample size (AICc) was used to estimate differences among all 44 models. Instead of speciation and extinction rate parameters, HiSSE optimizes transformations of these variables: Turnover rate ( $\tau$ ; speciation rate  $\lambda$  + extinction rate  $\mu$ ) and extinction fraction ( $\varepsilon = \mu/\lambda$ ). Number of free parameters (df), log likelihood (LnL), Akaike weights (AICw).

| #        | Model         | Parameter                                                                                                                    | df       | LnL           | AICc          | $\Delta$ AICc | AICw       |
|----------|---------------|------------------------------------------------------------------------------------------------------------------------------|----------|---------------|---------------|---------------|------------|
| 1        | BiSSE         | All                                                                                                                          | 6        | -820.8        | 1653.6        | 16.5          | 0.0        |
| 2        | BiSSE         | $\varepsilon_0=\varepsilon_1$                                                                                                | 5        | -825.9        | 1661.9        | 24.9          | 0.0        |
| 3        | BiSSE         | q's equal                                                                                                                    | 5        | -823.3        | 1656.7        | 19.7          | 0.0        |
| 4        | BiSSE         | $\varepsilon_0=\varepsilon_1$ , q's equal                                                                                    | 4        | -839.7        | 1687.3        | 50.3          | 0.0        |
| <b>5</b> | <b>Null-2</b> | <b>q's equal</b>                                                                                                             | <b>5</b> | <b>-813.5</b> | <b>1637.0</b> | <b>0.0</b>    | <b>0.4</b> |
| 6        | Null-2        | $\varepsilon$ 's, q's equal                                                                                                  | 3        | -827.3        | 1660.7        | 23.6          | 0.0        |
| 7        | Null-2        | q's diff                                                                                                                     | 8        | -840.5        | 1705.0        | 68.0          | 0.0        |
| 8        | Null-2        | $\varepsilon$ 's, q's diff                                                                                                   | 5        | -831.0        | 1684.0        | 47.0          | 0.0        |
| 9        | Null-4        | q's equal                                                                                                                    | 8        | -812.5        | 1643.0        | 6.0           | 0.0        |
| 10       | Null-4        | $\varepsilon$ 's equal, q's equal                                                                                            | 5        | -814.5        | 1641.0        | 4.0           | 0.1        |
| 11       | Null-4        | q's diff                                                                                                                     | 16       | -809.1        | 1652.2        | 15.1          | 0.0        |
| 12       | Null-4        | $\varepsilon$ 's equal, q's diff                                                                                             | 13       | -809.6        | 1647.1        | 10.1          | 0.0        |
| 13       | HiSSE         | q's equal                                                                                                                    | 9        | -815.8        | 1649.5        | 12.5          | 0.0        |
| 14       | HiSSE         | $\varepsilon$ 's equal, q's equal                                                                                            | 6        | -822.1        | 1656.3        | 19.2          | 0.0        |
| 15       | HiSSE         | $\tau_0A=\tau_1A=\tau_0B$ , $\varepsilon_0A=\varepsilon_1A=\varepsilon_0B$ , q's equal                                       | 5        | -823.5        | 1656.9        | 19.9          | 0.0        |
| 16       | HiSSE         | $\tau_0A=\tau_1A=\tau_0B$ , $\varepsilon$ 's equal, q's equal                                                                | 4        | -815.2        | 1638.5        | 1.5           | 0.2        |
| 17       | HiSSE         | $q_0B_1B=0$ , $q_1B_0B=0$ , all other q's equal                                                                              | 9        | -811.2        | 1640.4        | 3.4           | 0.1        |
| 18       | HiSSE         | $\varepsilon$ 's equal, $q_0B_1B=0$ , $q_1B_0B=0$ , all other q's equal                                                      | 6        | -827.9        | 1667.7        | 30.7          | 0.0        |
| 19       | HiSSE         | $\tau_0A=\tau_1A=\tau_0B$ , $\varepsilon_0A=\varepsilon_1A=\varepsilon_0B$ , $q_0B_1B=0$ , $q_1B_0B=0$ , all other q's equal | 5        | -835.9        | 1681.9        | 44.9          | 0.0        |
| 20       | HiSSE         | $\tau_0A=\tau_1A=\tau_0B$ , $\varepsilon$ 's equal, $q_0B_1B=0$ , $q_1B_0B=0$ , all other q's equal                          | 4        | -841.4        | 1690.8        | 53.8          | 0.0        |
| 21       | HiSSE         | $\tau_0A=\tau_1A$ , $\varepsilon_0A=\varepsilon_1A$ , q's equal                                                              | 7        | -812.9        | 1639.7        | 2.7           | 0.1        |
| 22       | HiSSE         | $\tau_0A=\tau_1A$ , $\varepsilon$ 's equal, q's equal                                                                        | 5        | -816.0        | 1642.1        | 5.0           | 0.0        |
| 23       | HiSSE         | $\tau_0A=\tau_1A$ , $\varepsilon_0A=\varepsilon_1A$ , $q_0B_1B=0$ , $q_1B_0B=0$ , all other q's equal                        | 7        | -825.5        | 1665.0        | 28.0          | 0.0        |
| 24       | HiSSE         | $\tau_0A=\tau_1A$ , $\varepsilon$ 's equal, $q_0B_1B=0$ , $q_1B_0B=0$ , all other q's equal                                  | 5        | -825.5        | 1661.0        | 24.0          | 0.0        |
| 25       | HiSSE         | $\tau_0A=\tau_0B$ , $\varepsilon_0A=\varepsilon_0B$ , q's equal                                                              | 7        | -814.3        | 1642.5        | 5.5           | 0.0        |
| 26       | HiSSE         | $\tau_0A=\tau_0B$ , $\varepsilon$ 's equal, q's equal                                                                        | 5        | -821.2        | 1652.4        | 15.4          | 0.0        |
| 27       | HiSSE         | $\tau_0A=\tau_0B$ , $\varepsilon_0A=\varepsilon_0B$ , $q_0B_1B=0$ , $q_1B_0B=0$ , all other q's equal                        | 7        | -816.4        | 1646.8        | 9.7           | 0.0        |
| 28       | HiSSE         | $\tau_0A=\tau_0B$ , $\varepsilon$ 's equal, $q_0B_1B=0$ , $q_1B_0B=0$ , all other q's equal                                  | 5        | -825.1        | 1660.2        | 23.2          | 0.0        |
| 29       | HiSSE         | q's diff                                                                                                                     | 16       | -812.6        | 1657.3        | 20.3          | 0.0        |
| 30       | HiSSE         | $\varepsilon$ 's equal, q's diff                                                                                             | 13       | -822.2        | 1670.4        | 33.4          | 0.0        |
| 31       | HiSSE         | $\tau_0A=\tau_1A=\tau_0B$ , $\varepsilon_0A=\varepsilon_1A=\varepsilon_0B$ , q's diff                                        | 12       | -842.1        | 1708.3        | 71.2          | 0.0        |
| 32       | HiSSE         | $\tau_0A=\tau_1A=\tau_0B$ , $\varepsilon$ 's equal, q's diff                                                                 | 11       | -822.1        | 1666.2        | 29.2          | 0.0        |
| 33       | HiSSE         | $q_0B_1B=0$ , $q_1B_0B=0$ , all other q's diff                                                                               | 14       | -816.8        | 1661.6        | 24.6          | 0.0        |
| 34       | HiSSE         | $\varepsilon$ 's equal, $q_0B_1B=0$ , $q_1B_0B=0$ , all other q's diff                                                       | 11       | -820.4        | 1662.7        | 25.7          | 0.0        |
| 35       | HiSSE         | $\tau_0A=\tau_1A=\tau_0B$ , $\varepsilon_0A=\varepsilon_1A=\varepsilon_0B$ , $q_0B_1B=0$ , $q_1B_0B=0$ , all other q's diff  | 10       | -818.7        | 1657.4        | 20.4          | 0.0        |
| 36       | HiSSE         | $\tau_0A=\tau_1A=\tau_0B$ , $\varepsilon$ 's equal, $q_0B_1B=0$ , $q_1B_0B=0$ , all other q's diff                           | 9        | -833.2        | 1684.3        | 47.3          | 0.0        |
| 37       | HiSSE         | $\tau_0A=\tau_1A$ , $\varepsilon_0A=\varepsilon_1A$ , q's diff                                                               | 14       | -808.8        | 1645.6        | 8.6           | 0.0        |
| 38       | HiSSE         | $\tau_0A=\tau_1A$ , $\varepsilon$ 's equal, q's diff                                                                         | 12       | -826.0        | 1675.9        | 38.9          | 0.0        |
| 39       | HiSSE         | $\tau_0A=\tau_1A$ , $\varepsilon_0A=\varepsilon_1A$ , $q_0B_1B=0$ , $q_1B_0B=0$ , all other q's diff                         | 12       | -815.1        | 1654.2        | 17.1          | 0.0        |
| 40       | HiSSE         | $\tau_0A=\tau_1A$ , $\varepsilon$ 's equal, $q_0B_1B=0$ , $q_1B_0B=0$ , all other q's diff                                   | 10       | -816.3        | 1652.5        | 15.5          | 0.0        |
| 41       | HiSSE         | $\tau_0A=\tau_0B$ , $\varepsilon_0A=\varepsilon_0B$ , q's diff                                                               | 14       | -822.3        | 1672.7        | 35.6          | 0.0        |
| 42       | HiSSE         | $\tau_0A=\tau_0B$ , $\varepsilon$ 's equal, q's diff                                                                         | 12       | -830.0        | 1684.0        | 47.0          | 0.0        |
| 43       | HiSSE         | $\tau_0A=\tau_0B$ , $\varepsilon_0A=\varepsilon_0B$ , $q_0B_1B=0$ , $q_1B_0B=0$ , all other q's diff                         | 12       | -832.6        | 1689.2        | 52.1          | 0.0        |
| 44       | HiSSE         | $\tau_0A=\tau_0B$ , $\varepsilon$ 's equal, $q_0B_1B=0$ , $q_1B_0B=0$ , all other q's diff                                   | 10       | -824.7        | 1669.4        | 32.3          | 0.0        |

## Figure legends S1-S5

**Figure S1.** Results of the maximum likelihood phylogenetic tree reconstruction in IQ-Tree. Numbers at the internal nodes represent bootstrap support values of the Ultrafast bootstrap approximation approach.

**Figures S2.** Results from the divergence time analyses in BEAST. Trees represent the maximum credibility tree with median ages. Numbers at the internal nodes represent node age and node bars represent the 95% HPD values on node height (age). A) Results of the BEAST-I analysis with a Yule branching prior and a fixed tree topology. Blue squares indicate position of calibration fossils. B) Results of the BEAST-II analysis with a Birth-Death branching prior and a fixed tree topology. C) Results of the BEAST-III analysis, based on a constrained tree search.

**Figures S3.** Results of the diversification rate through time analyses in RevBayes. A-C: Diversification rate analyses based on BEAST-I tree. A) Incomplete taxon sampling covered by a uniform sampling strategy. B) Incomplete taxon sampling covered by an empirical sampling strategy considering the sampling fraction of Ceutorhyninae, “core Ceutorhynchini”, and the genus *Ceutorhynchus*. C) Incomplete taxon sampling covered by an empirical sampling strategy considering the sampling fraction of each genus. D) Diversification rate analyses based on BEAST-III tree and incomplete taxon sampling covered by a uniform sampling strategy. Ages provided in million years (Ma). Net diversification rate  $r = \text{speciation rate } \lambda - \text{extinction rate } \mu$ . Relative extinction rate ( $\varepsilon = \mu/\lambda$ ).

**Figure S4:** Results of the diversification rate through time analyses with TESS. Plots of speciation, extinction, net diversification, and relative extinction rates through time. Plots of the statistical support for rate shifts illustrate both the posterior probability and the Bayes Factor comparison to models with no rate shift. A+B: Diversification rate analyses based on BEAST-I tree and incomplete taxon sampling covered by a uniform sampling strategy. C+D: Diversification rate analyses based on BEAST-III and incomplete taxon sampling covered by a uniform sampling strategy.

**Figures S5:** Results of the clade-specific divergence time analyses in BAMM. Phylorate plots indicating the results of the evolutionary rate analyses. A-C: Diversification rate analyses based on BEAST-I tree. A) Incomplete taxon sampling covered by a uniform sampling strategy. B) Incomplete taxon sampling covered by an empirical sampling strategy considering the sampling fraction of Ceutorhyninae, “core Ceutorhynchini”, and the genus *Ceutorhynchus*. C) Incomplete taxon sampling covered by an empirical sampling strategy considering the sampling fraction of each genus. D) Diversification rate analyses based on BEAST-III tree and incomplete taxon sampling covered by a uniform sampling strategy. Colors indicate relative speciation rates along branches. Red circle indicates the position of a regime shift in the maximum shift credibility (MSC) configuration.

Figure S1

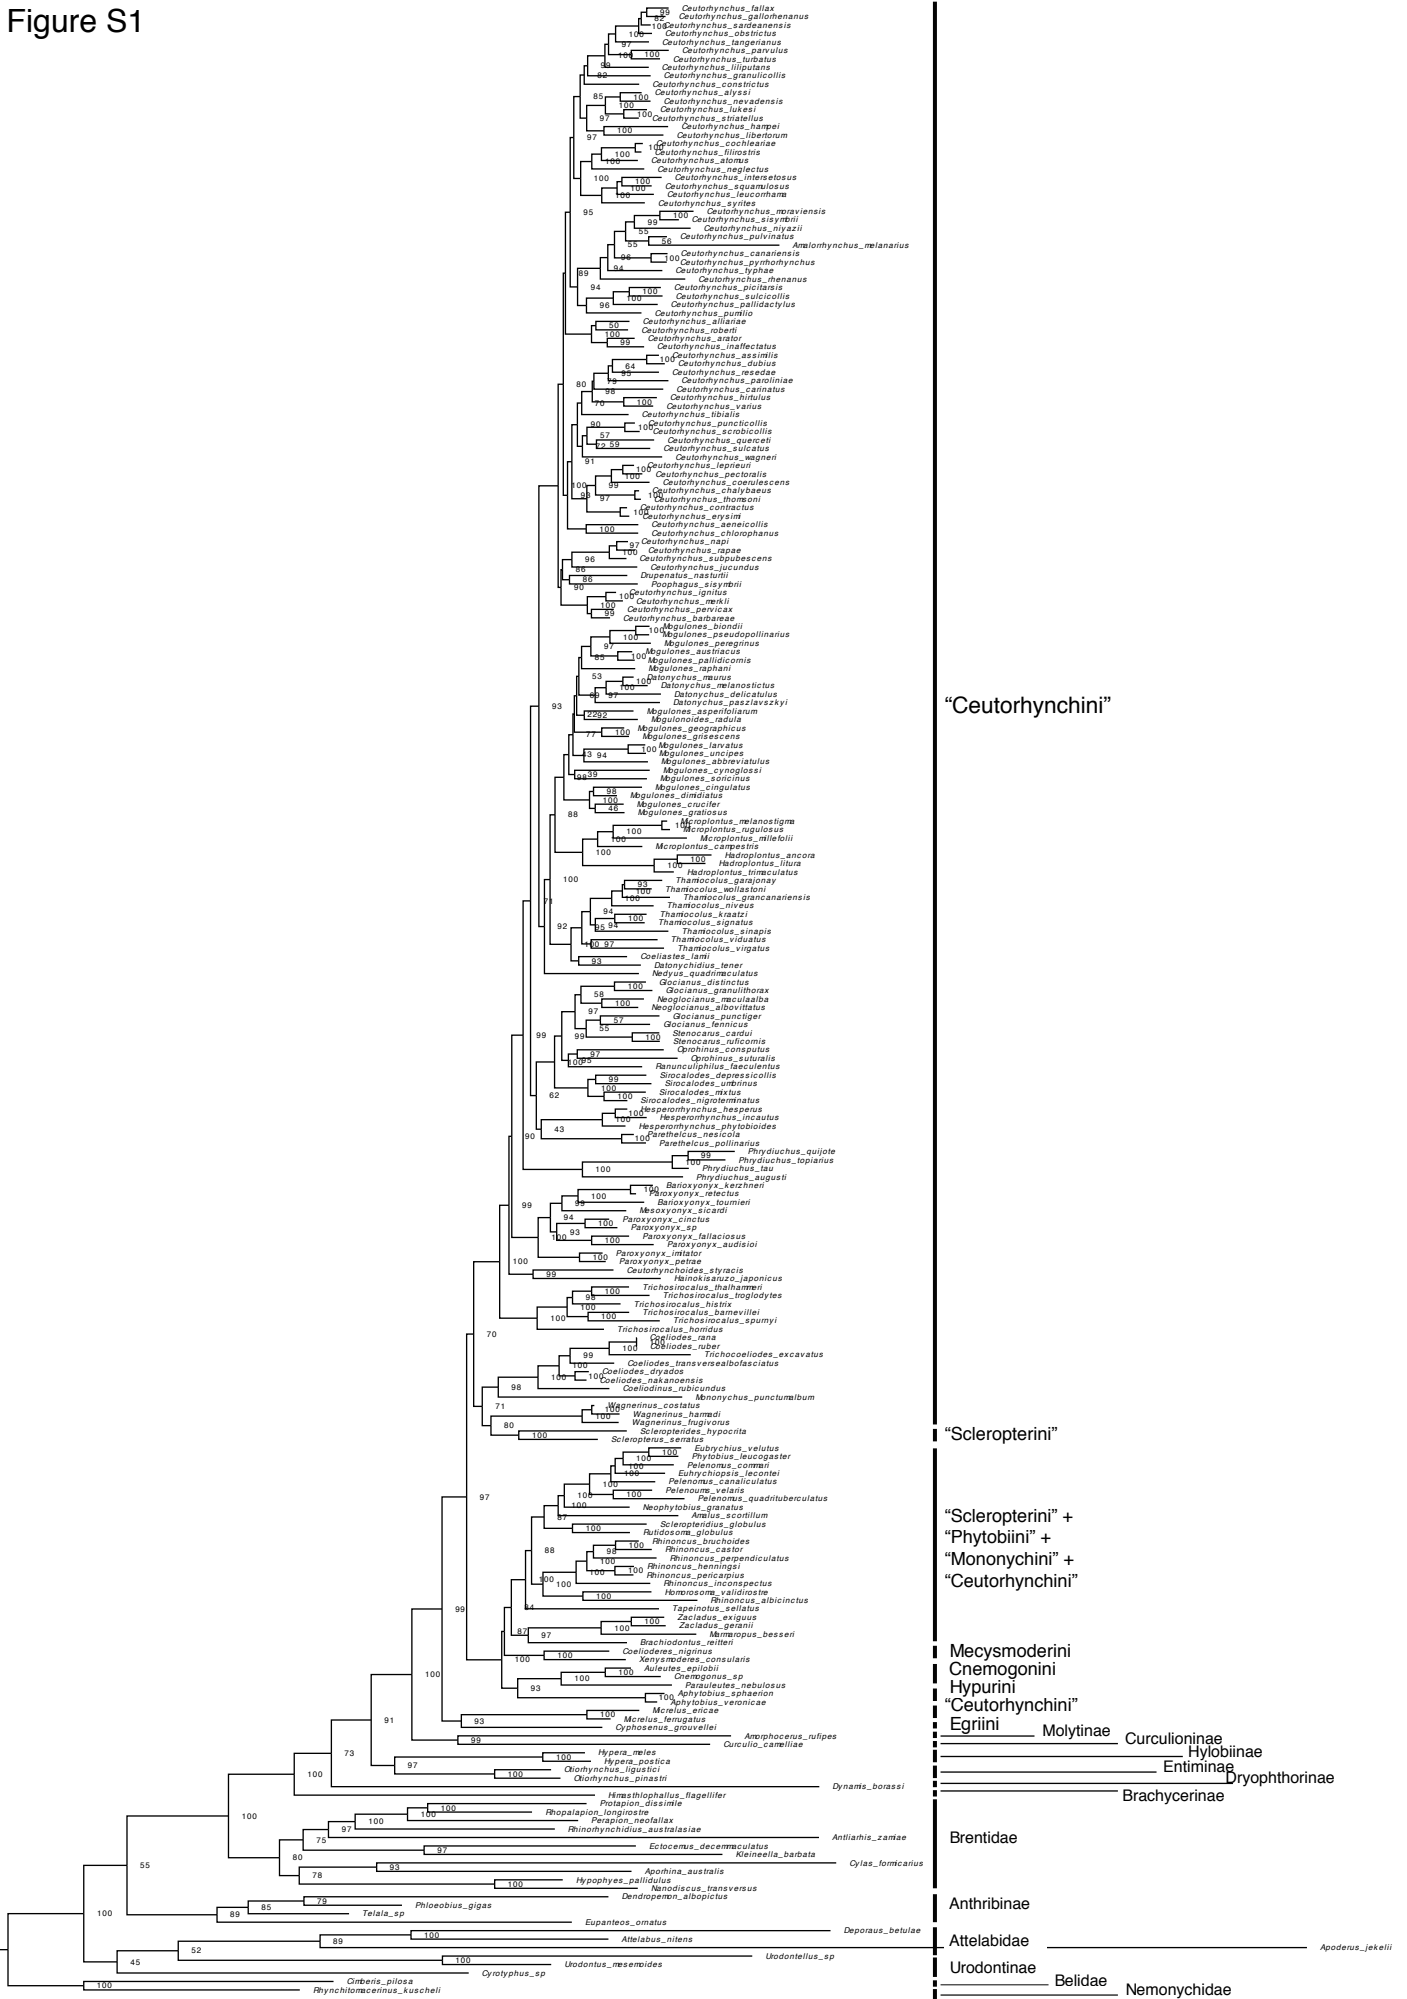

Figure S2A

- Ⓐ Ceutorhynchinae
- Ⓓ "Ceutorhynchini"
- ⒴ Oxyonychini
- Ⓞ "core Ceutorhynchini"
- Ⓥ *Thamiocolus* s.l.
- Ⓨ *Mogulones* s.l.
- Ⓩ *Ceutorhynchus* s.l.
- Fossil calibrations

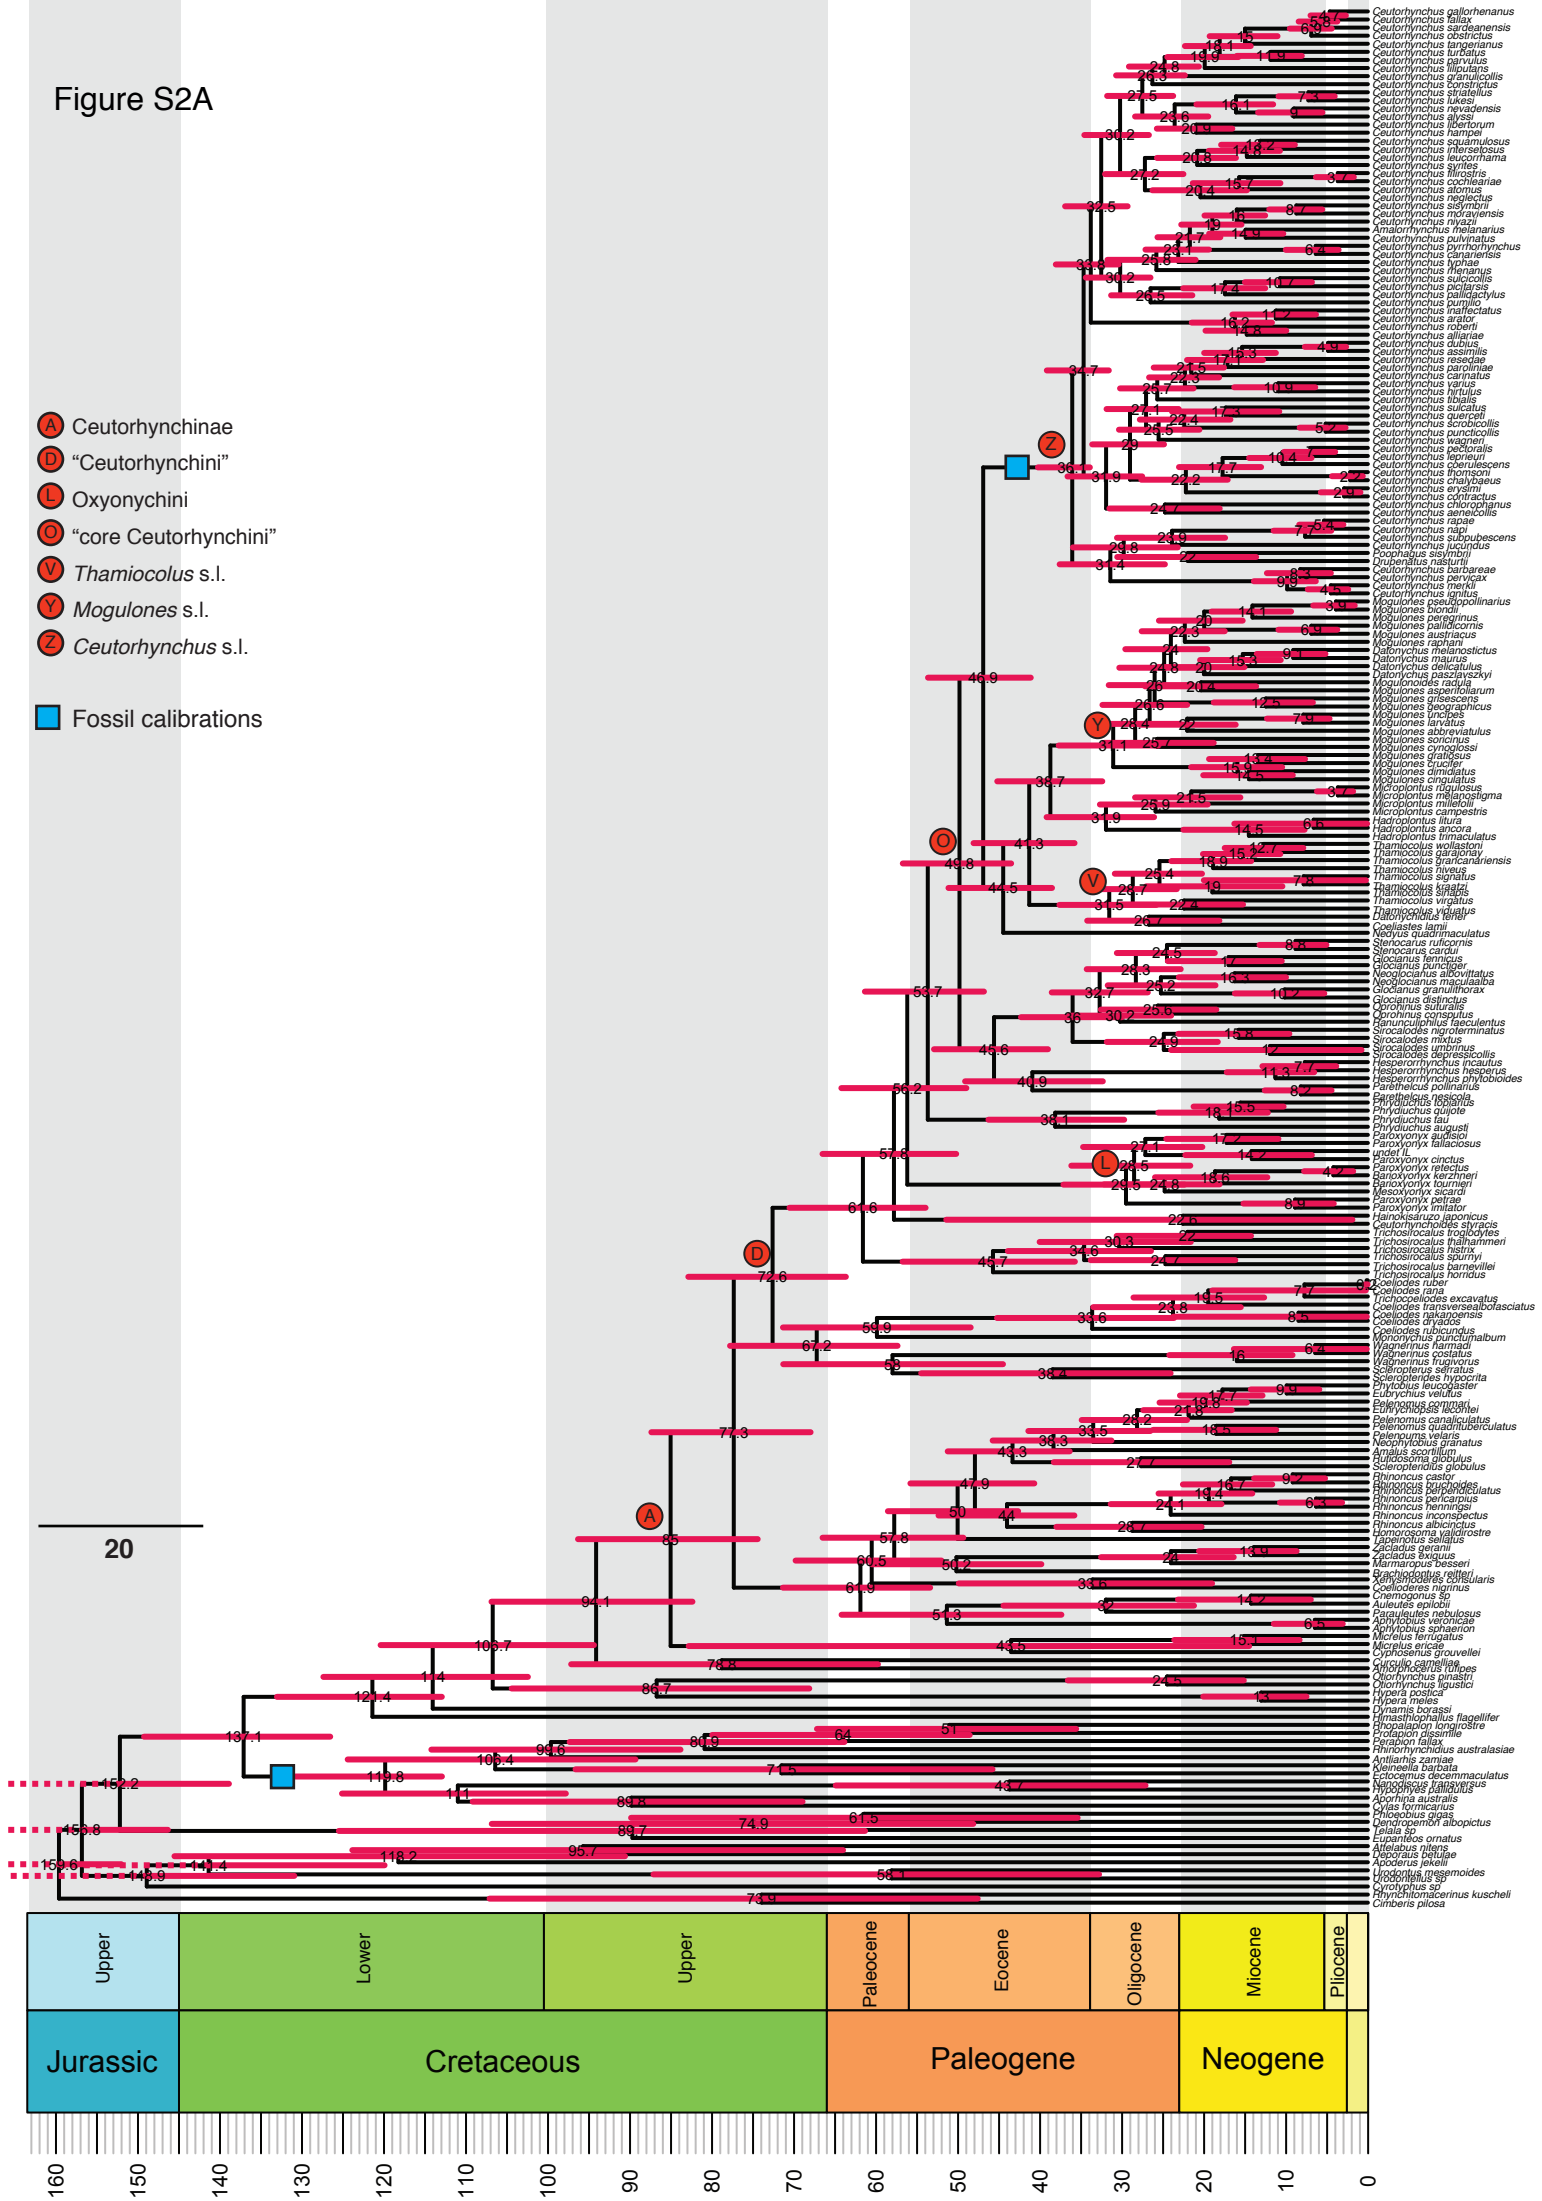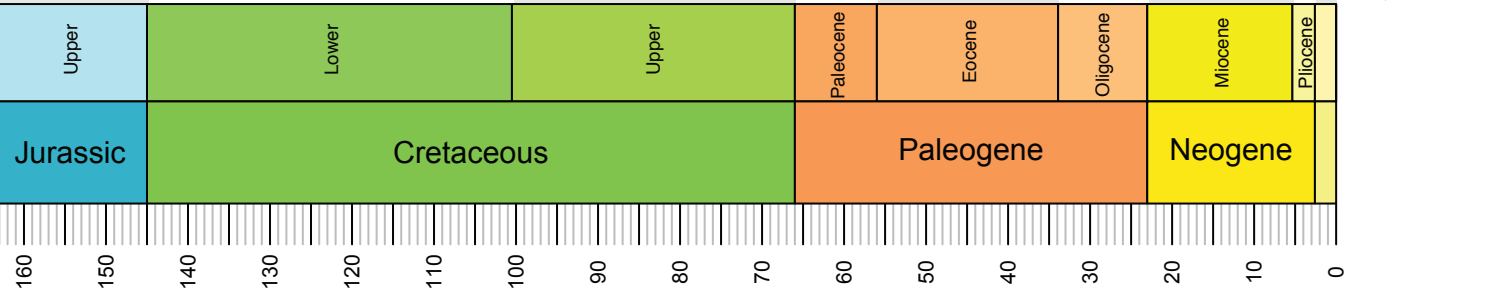

Figure S2B

- A Ceutorhynchinae
- D "Ceutorhynchini"
- L Oxyonychini
- O "core Ceutorhynchini"
- V *Thamiocolus* s.l.
- Y *Mogulones* s.l.
- Z *Ceutorhynchus* s.l.

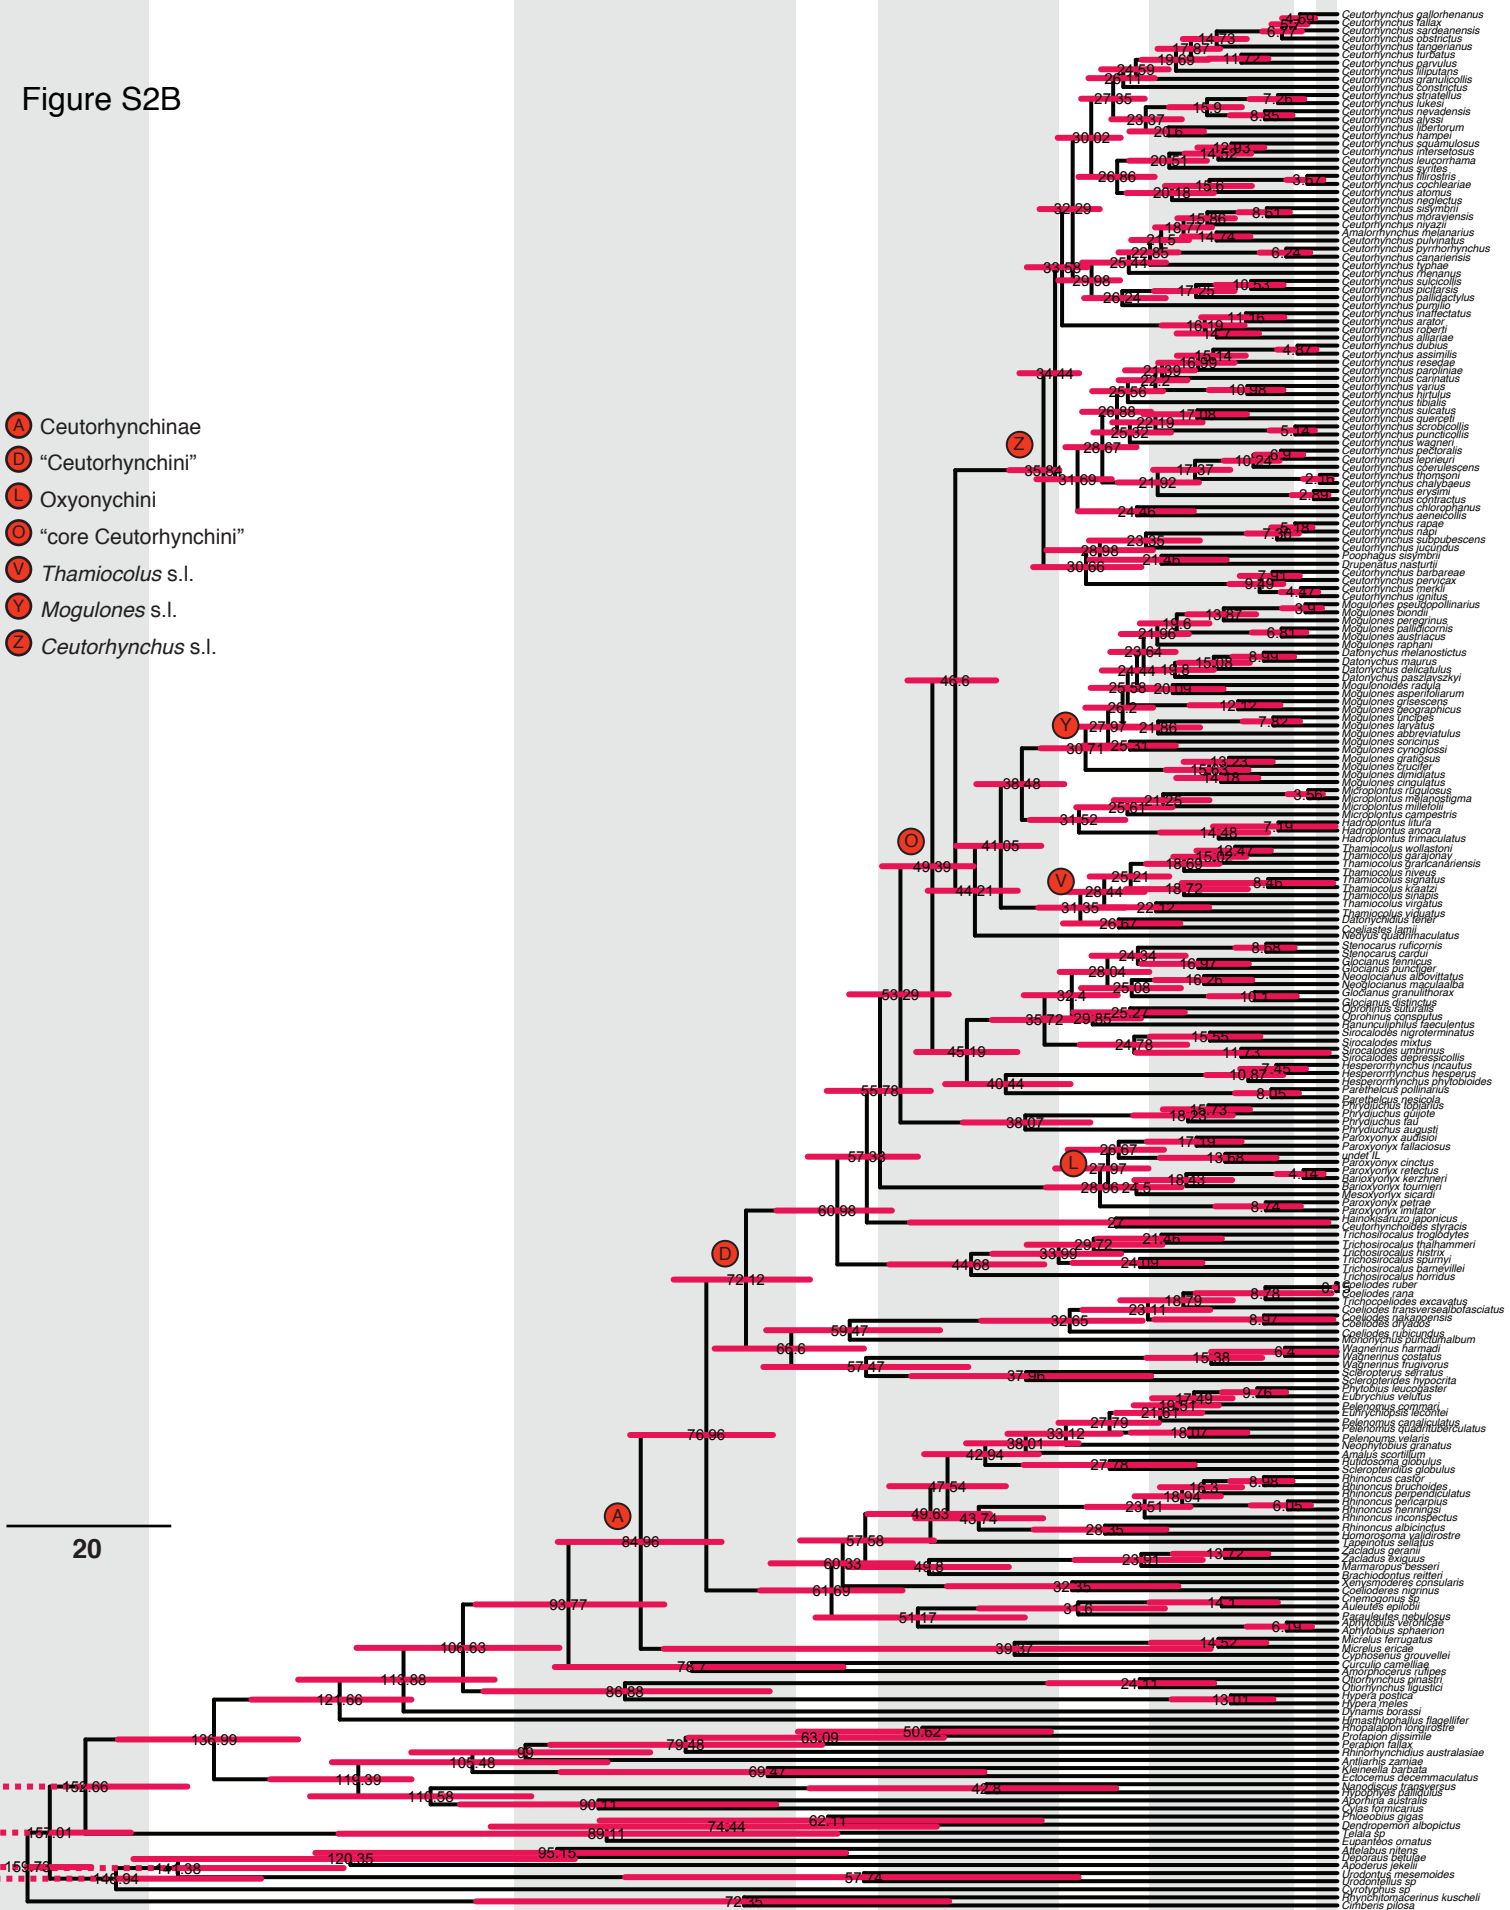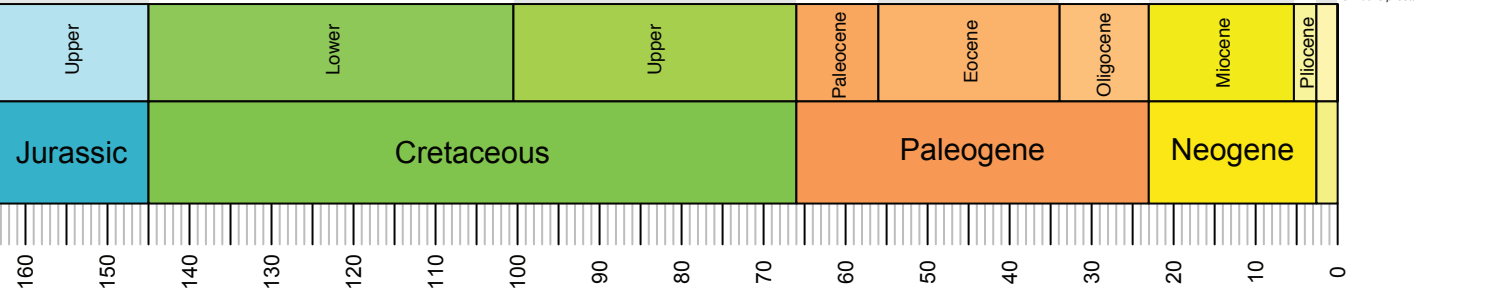



Figure S2C

- "Ceutorhynchinae"
- "Ceutorhynchini"
- Oxyonychini
- "core Ceutorhynchini"
- *Thamiocolus* s.l.
- *Mogulones* s.l.
- *Ceutorhynchus* s.l.

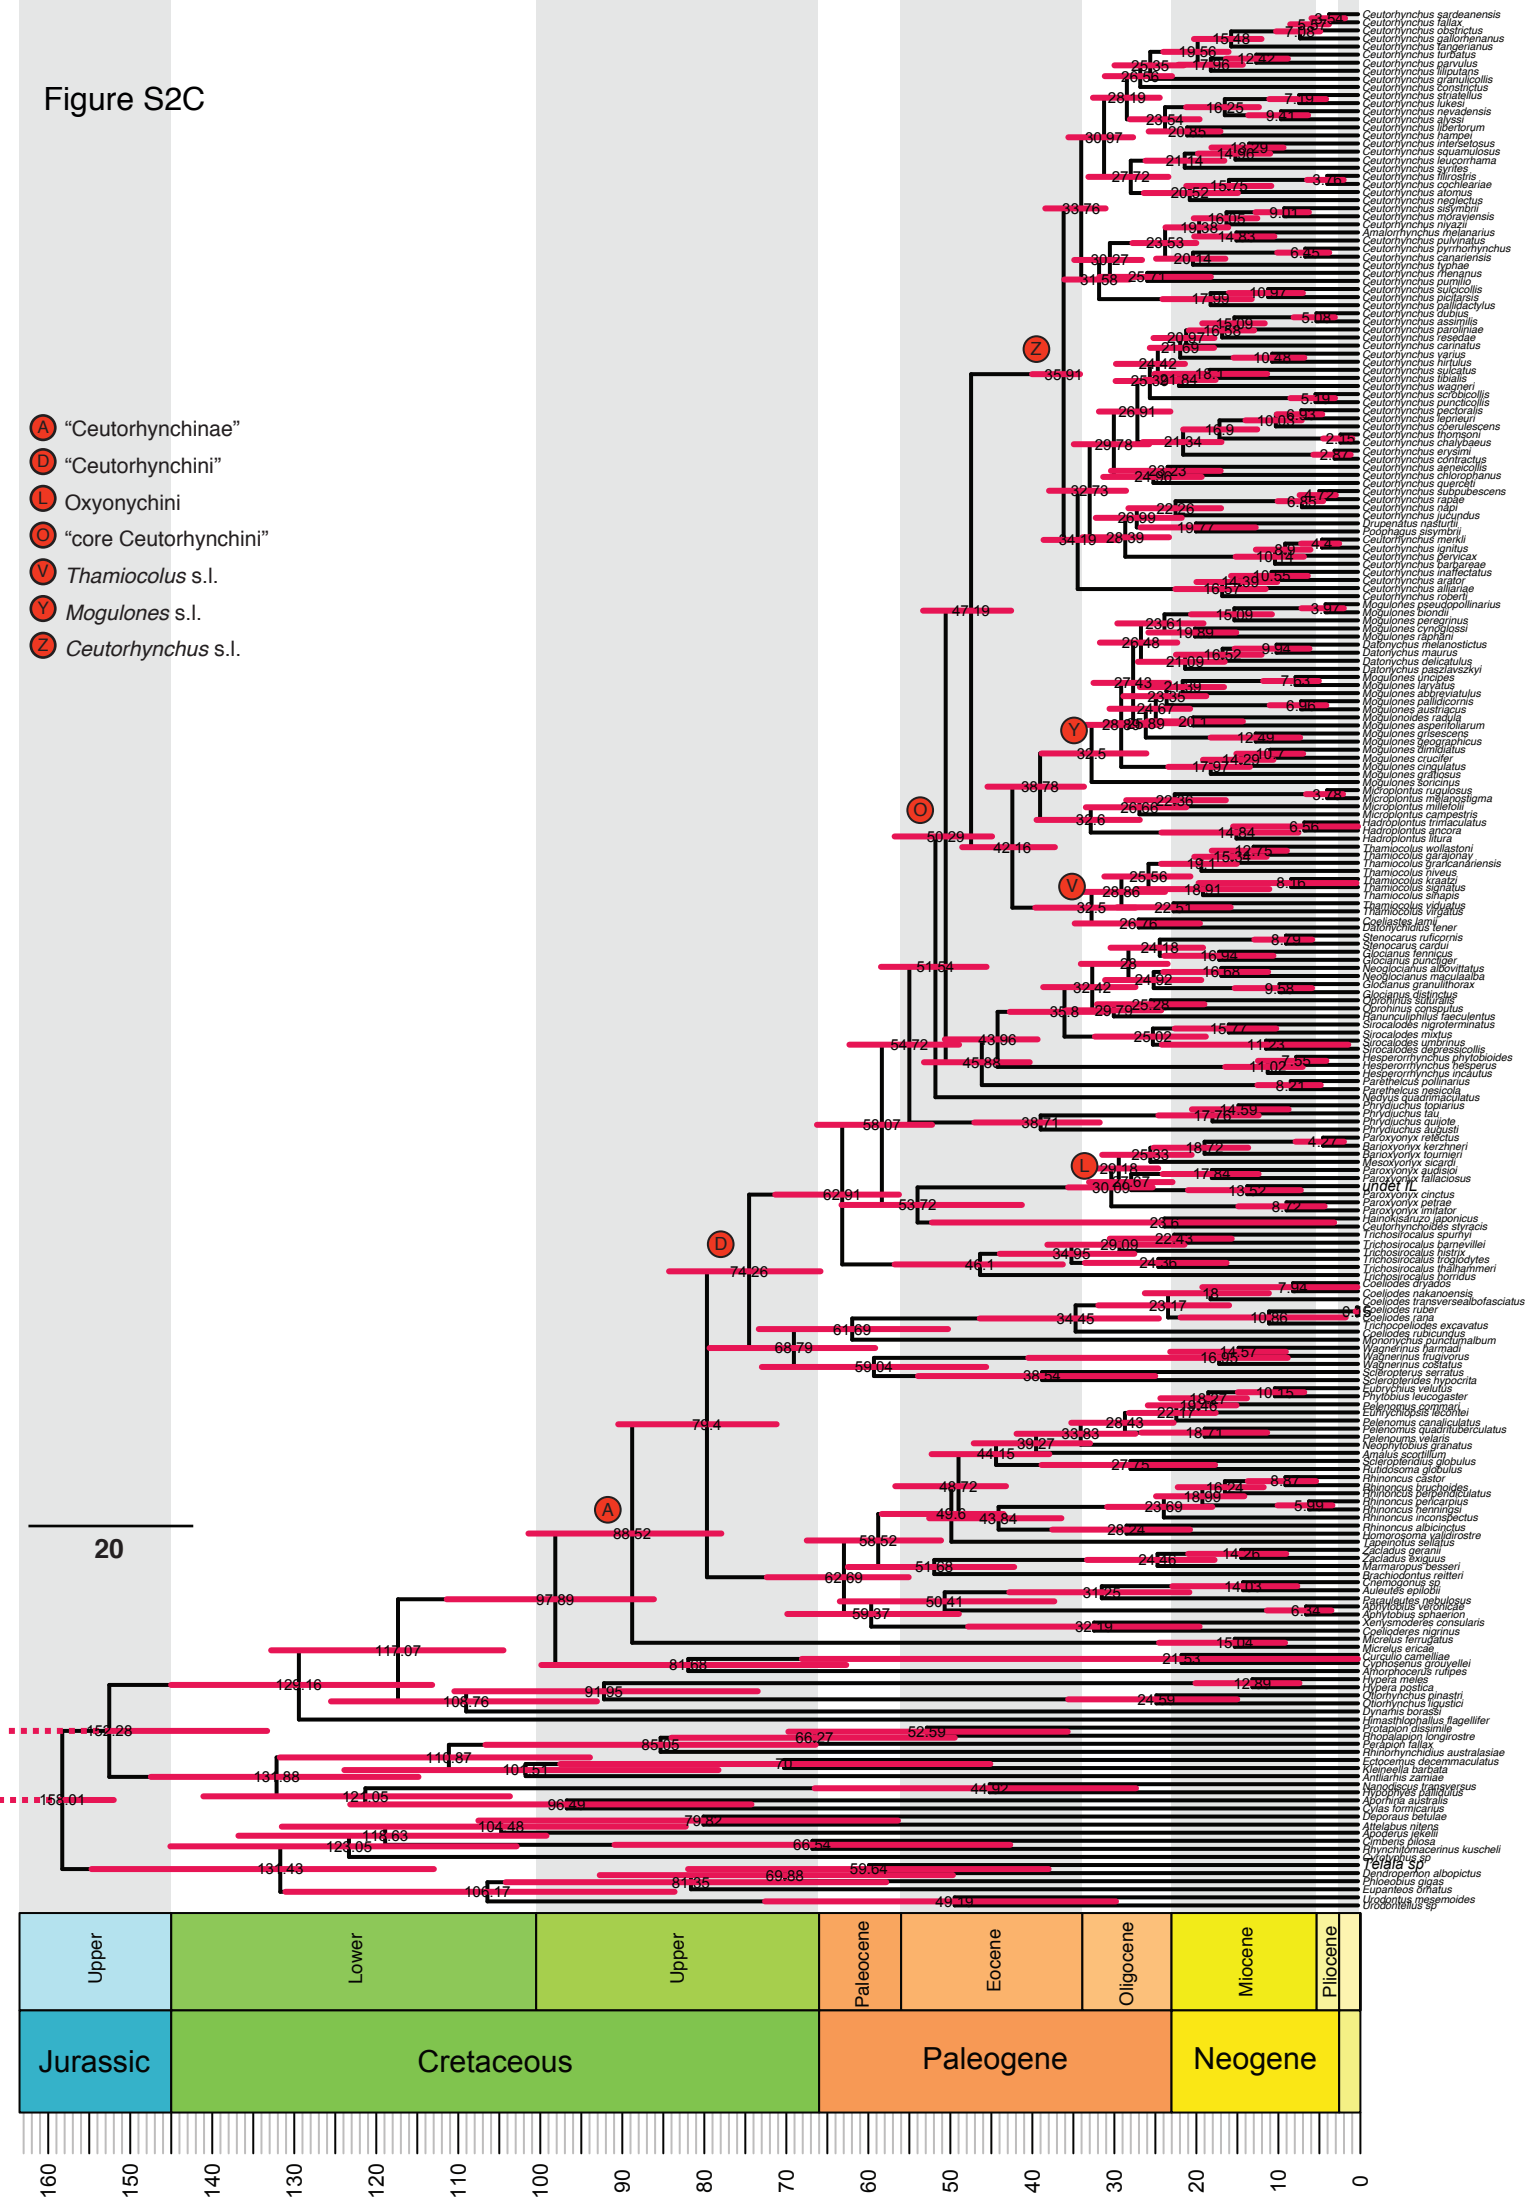

Figure S3A

### speciation rate

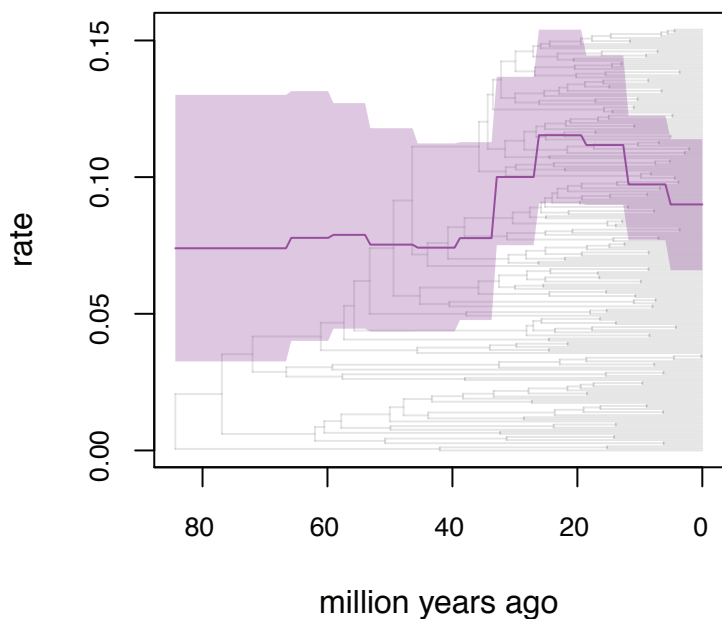

### extinction rate

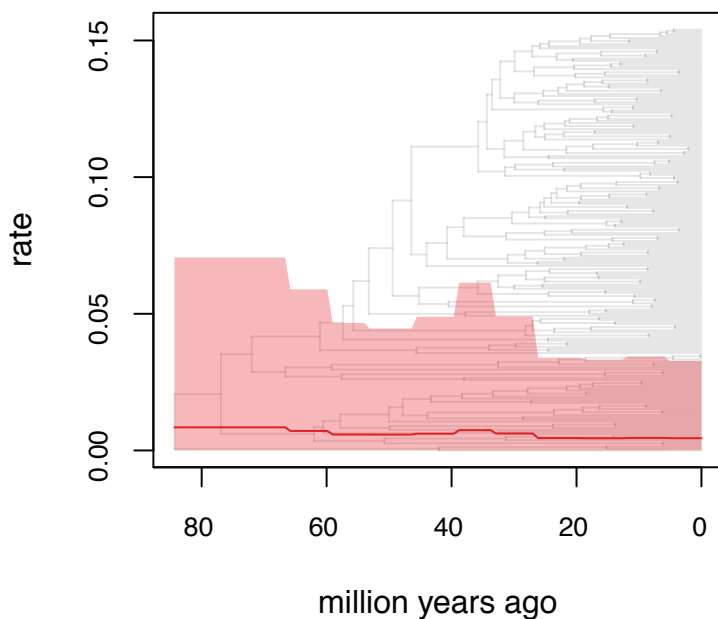

### net-diversification rate

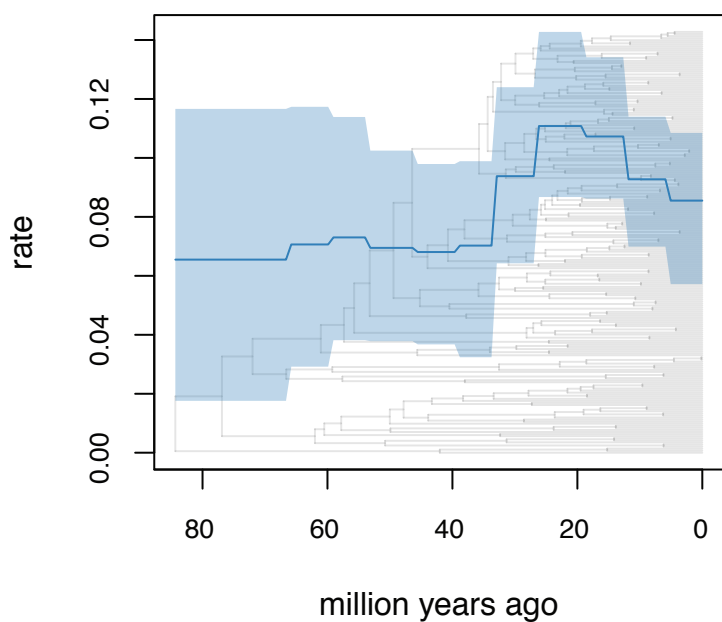

### relative-extinction rate

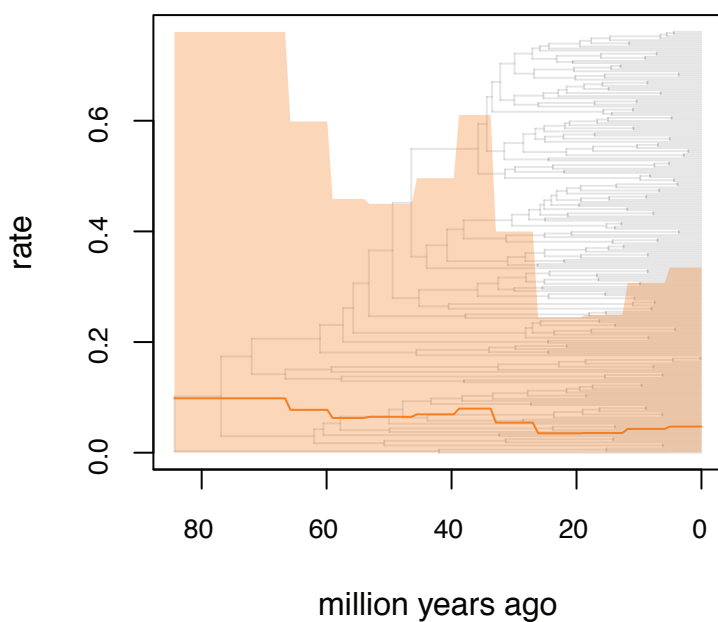

Figure S3B

### speciation rate

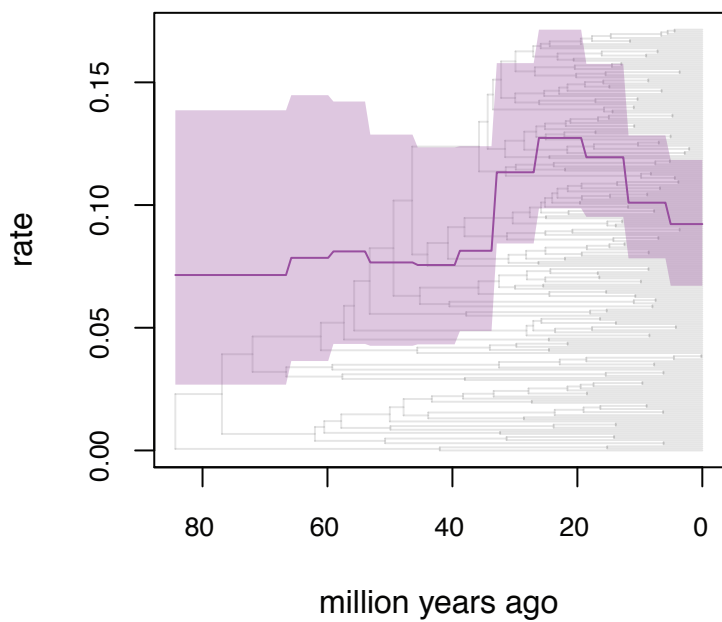

### extinction rate

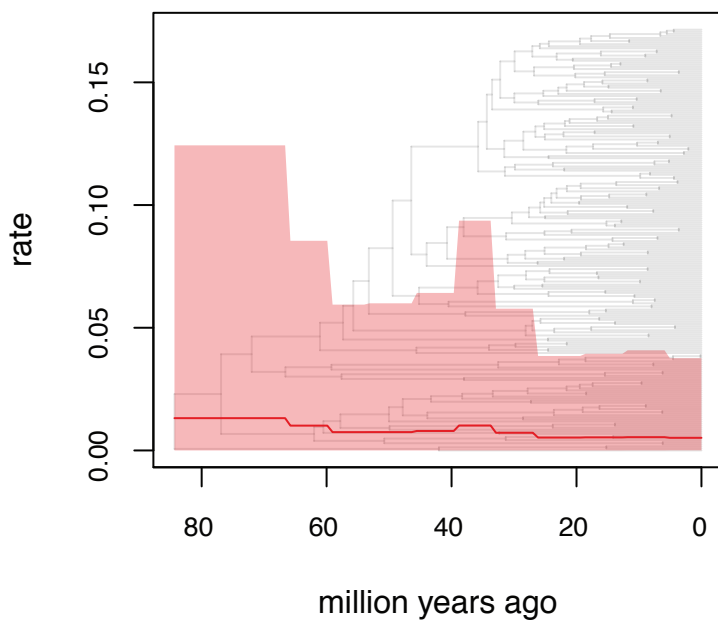

### net-diversification rate

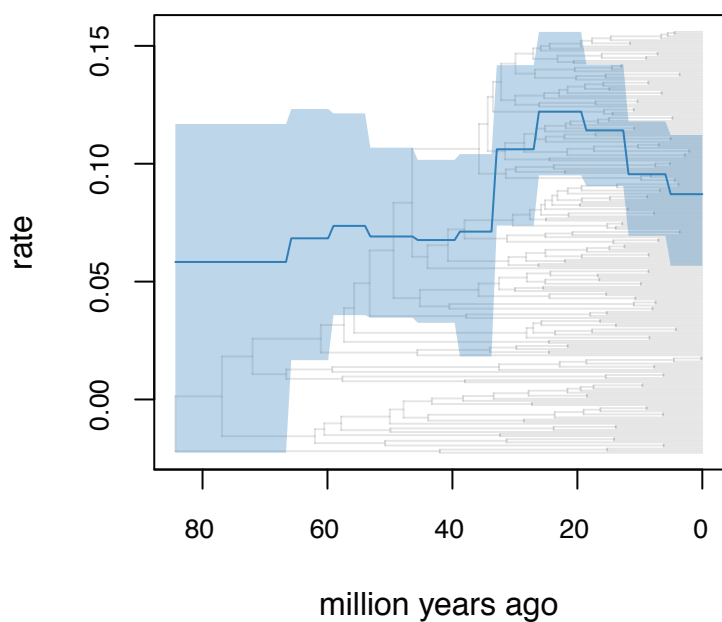

### relative-extinction rate

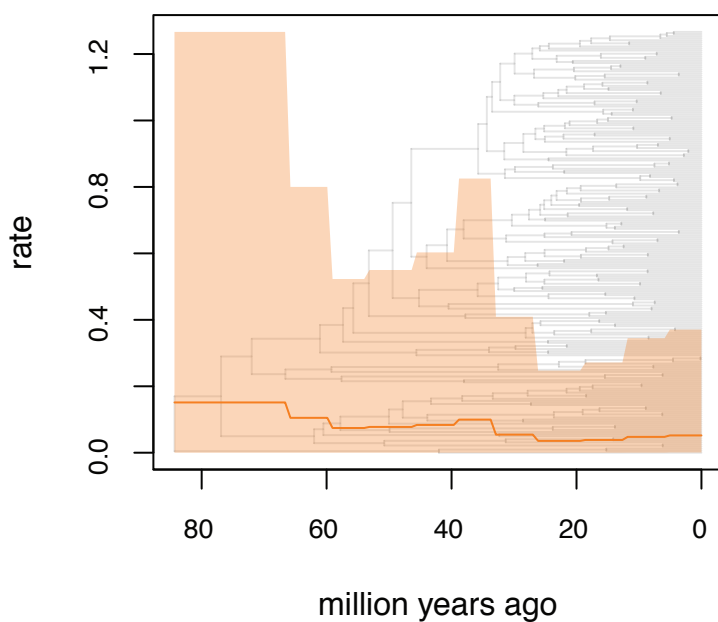

Figure S3C

### speciation rate

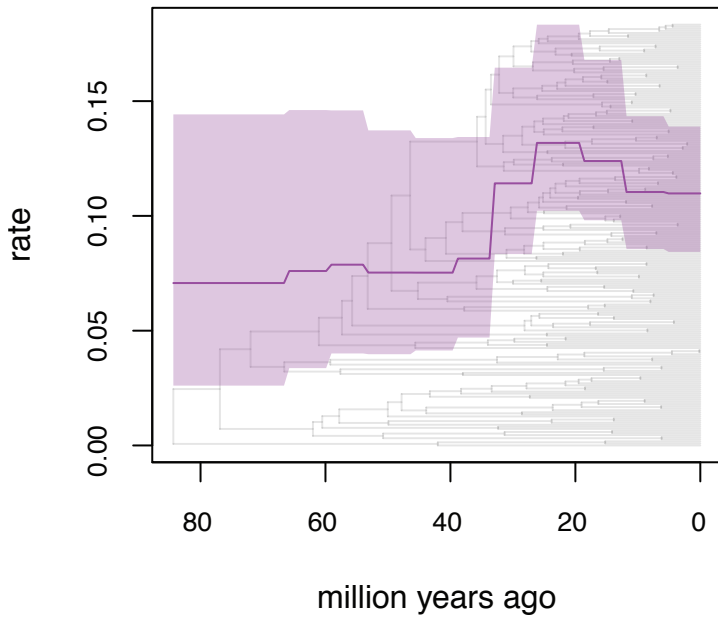

### extinction rate

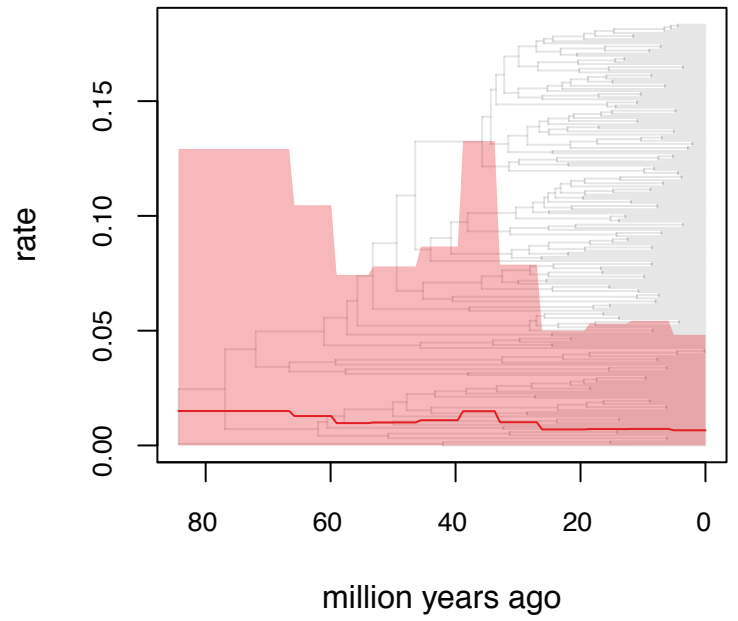

### net-diversification rate

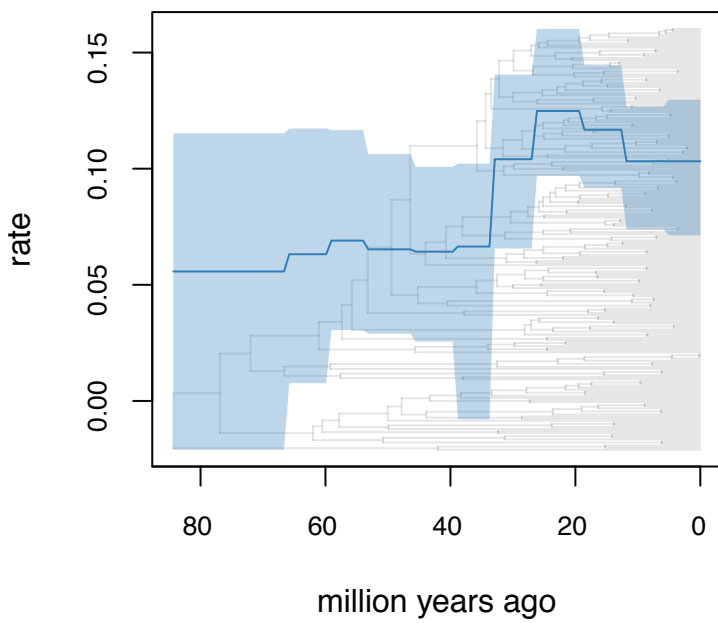

### relative-extinction rate

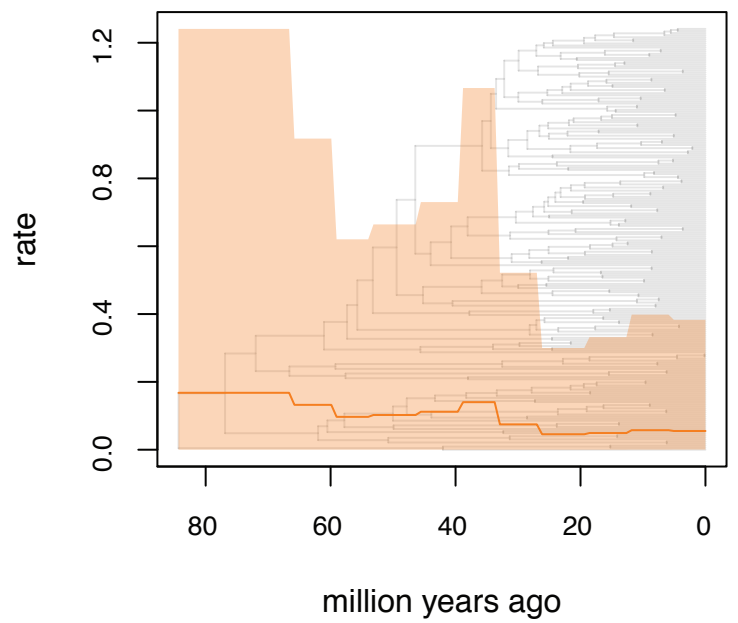

Figure S3D

### speciation rate

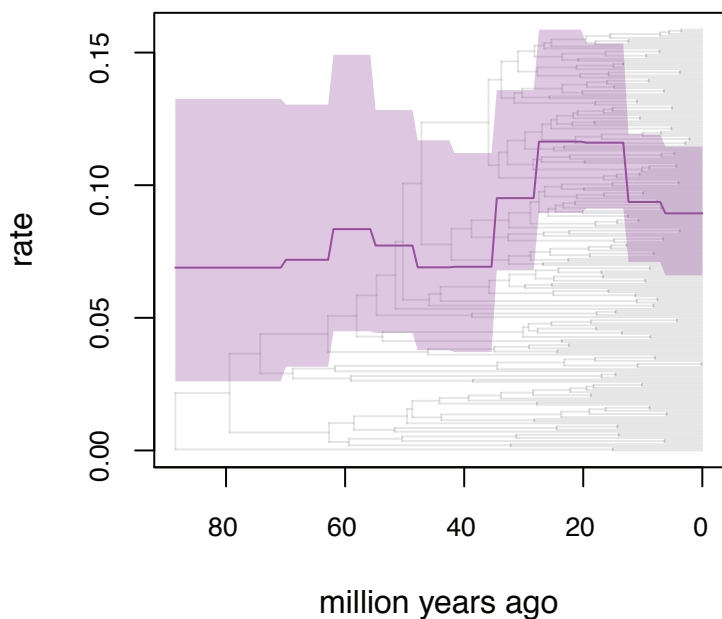

### extinction rate

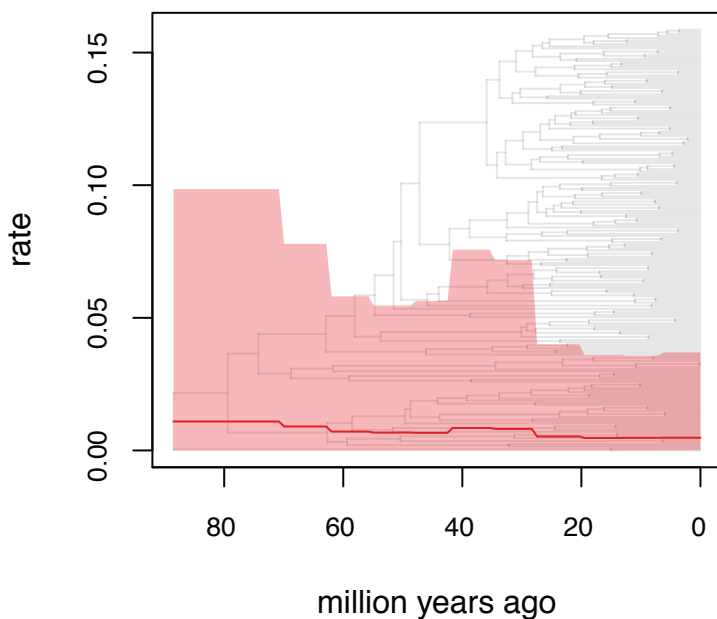

### net-diversification rate

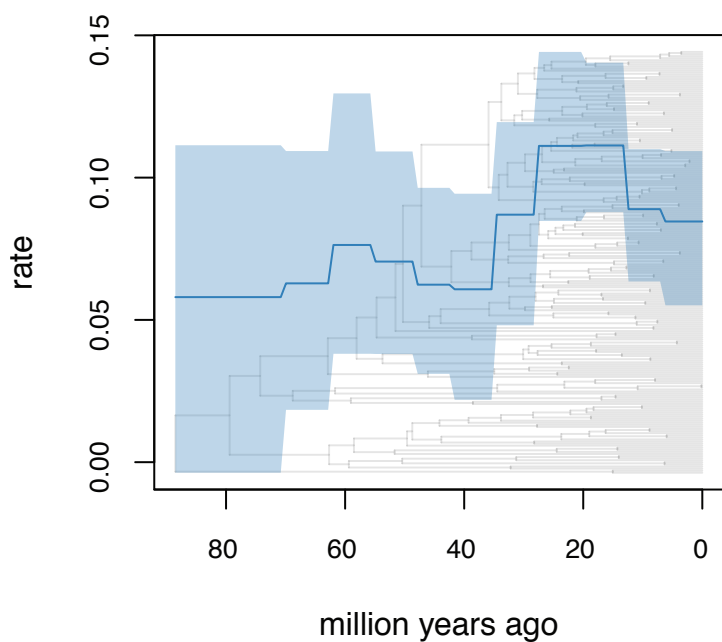

### relative-extinction rate

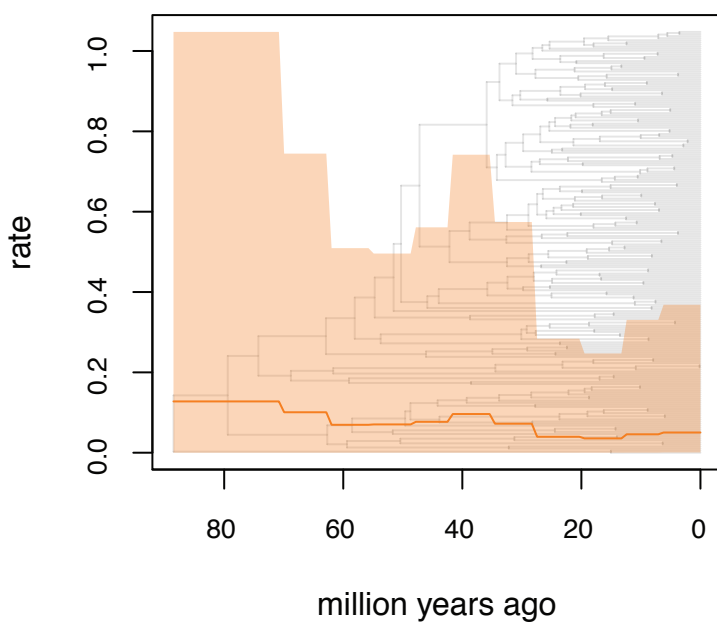

Figure S4A

### speciation rates

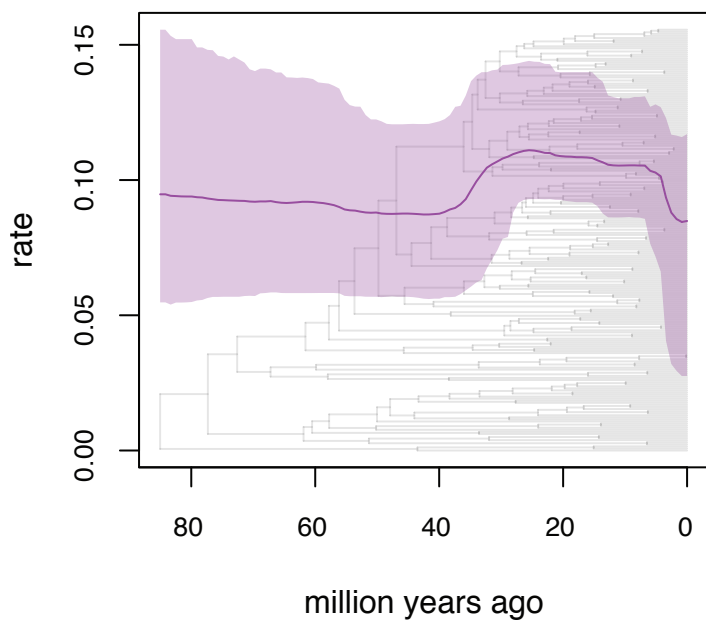

### speciation Bayes factors

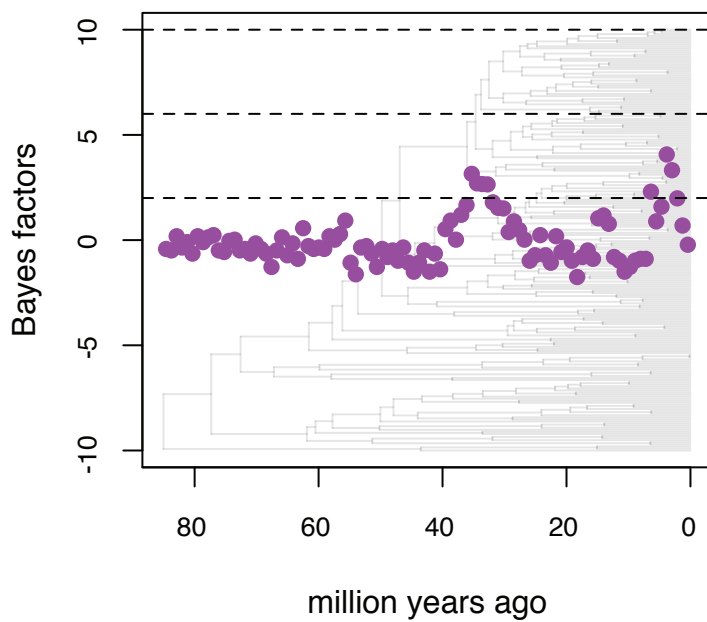

### extinction rates

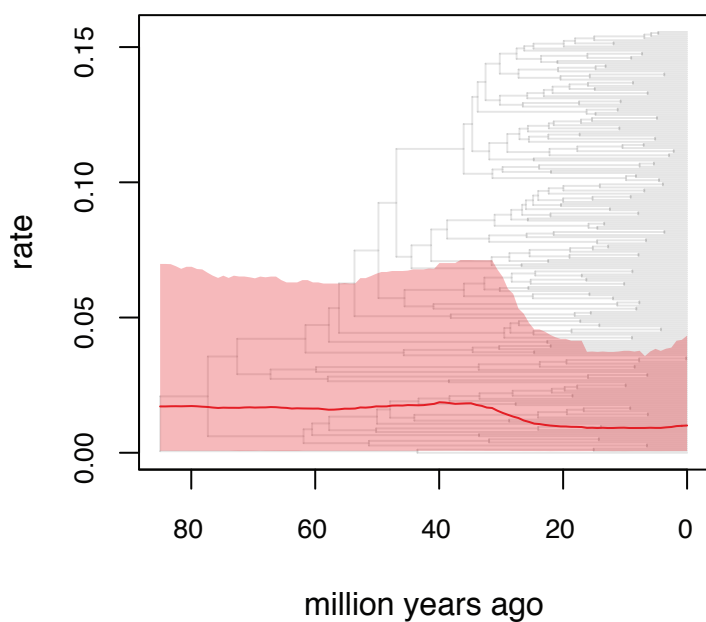

### extinction Bayes factors

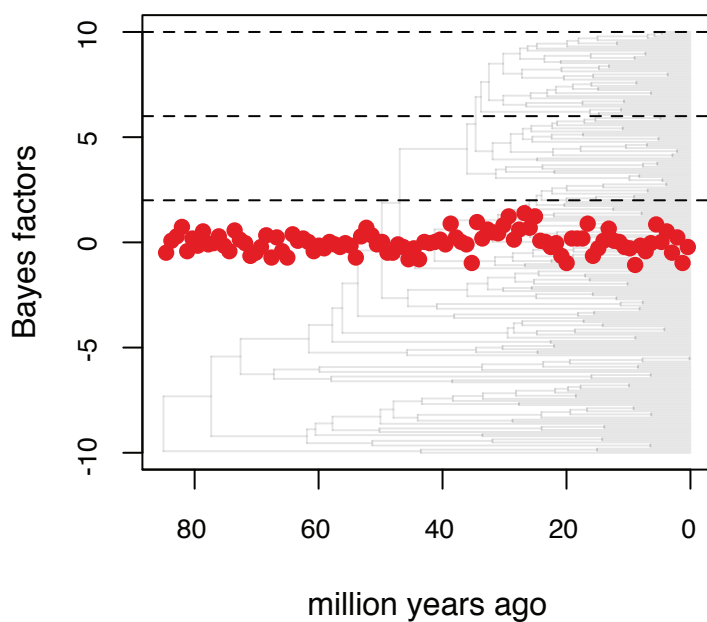

Figure S4B

### net-diversification rates

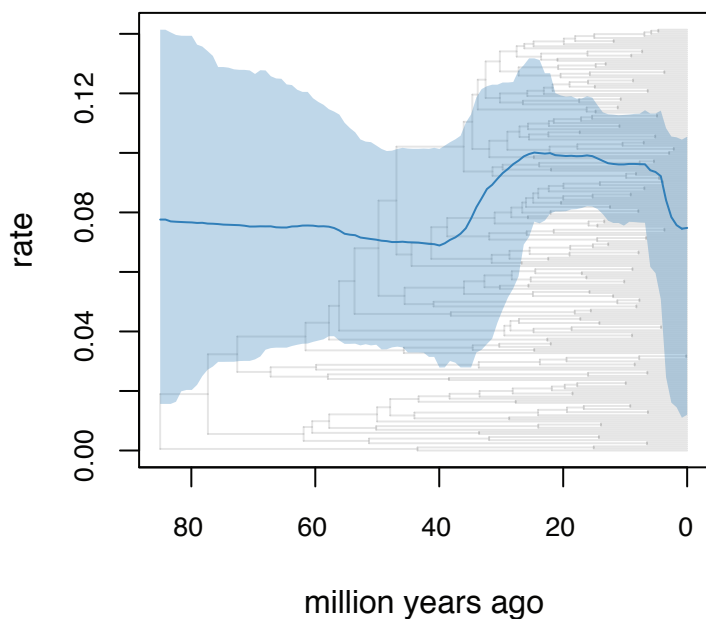

### relative-extinction rates

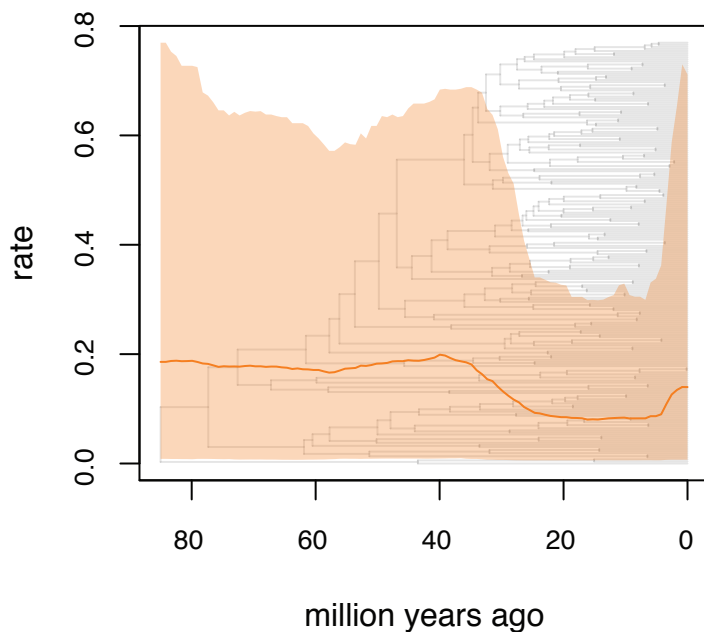

### mass extinction times

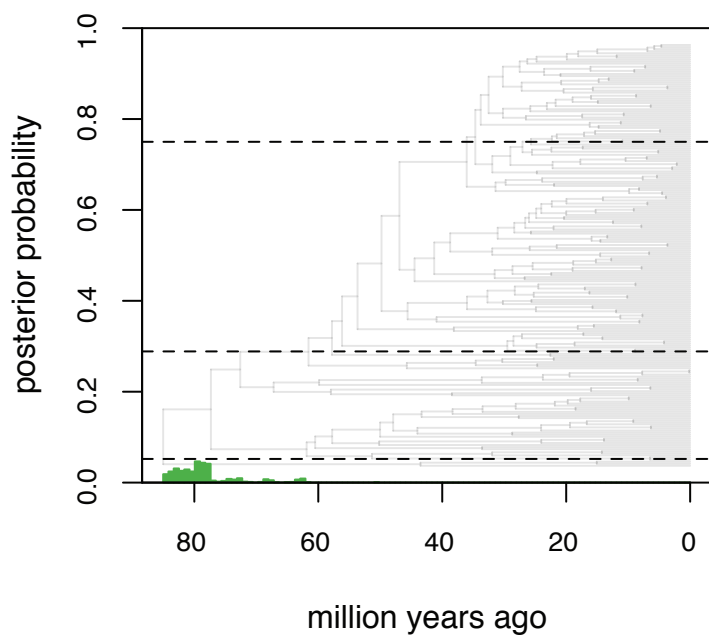

### mass extinction Bayes factors

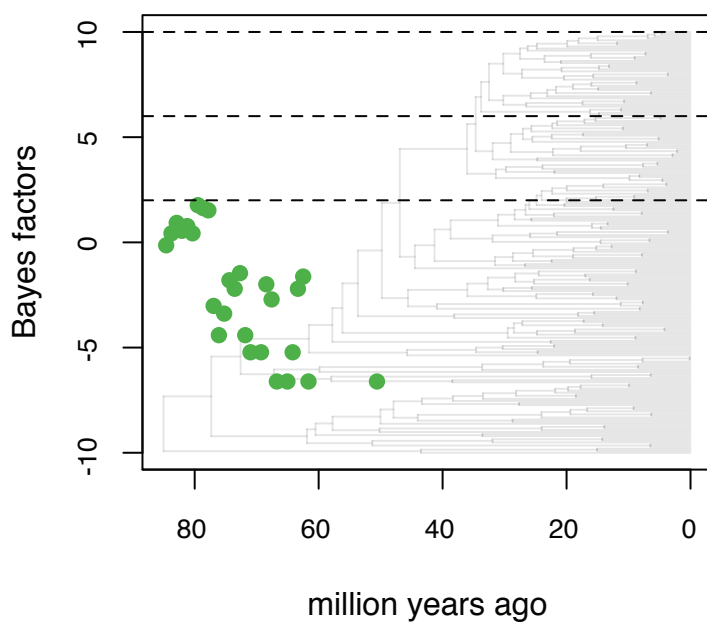

Figure S4C

### speciation rates

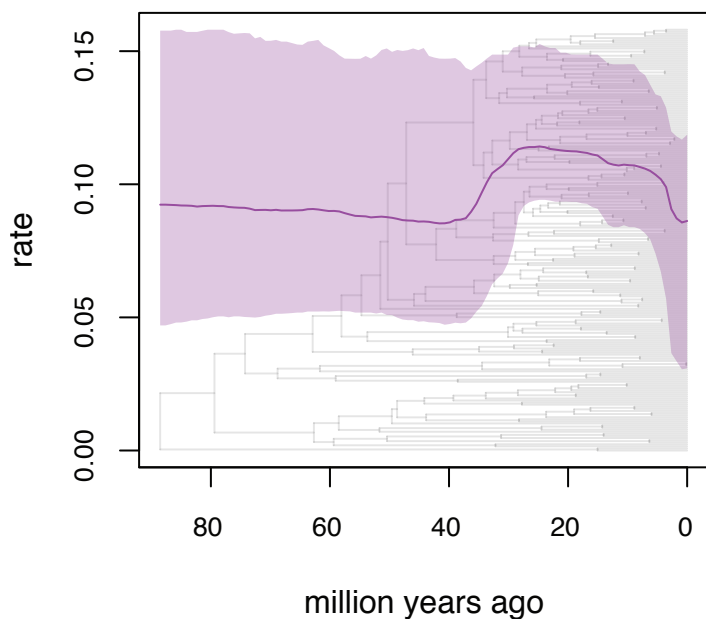

### speciation Bayes factors

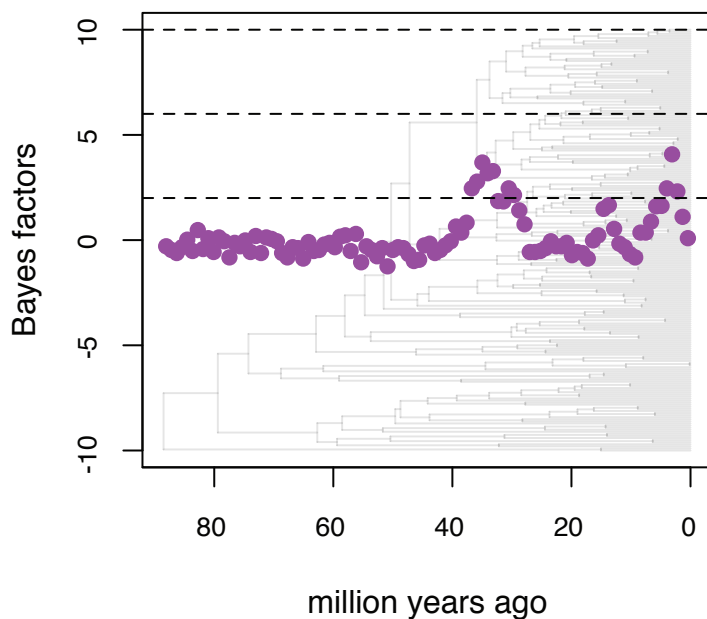

### extinction rates

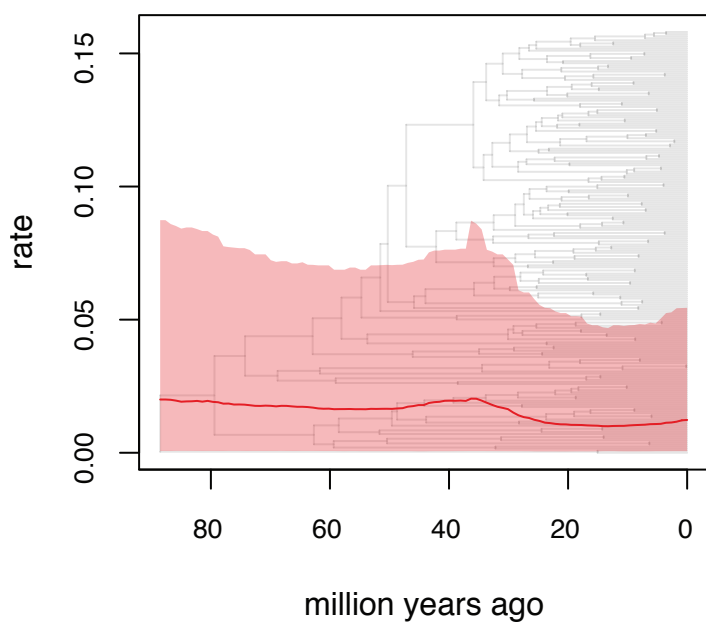

### extinction Bayes factors

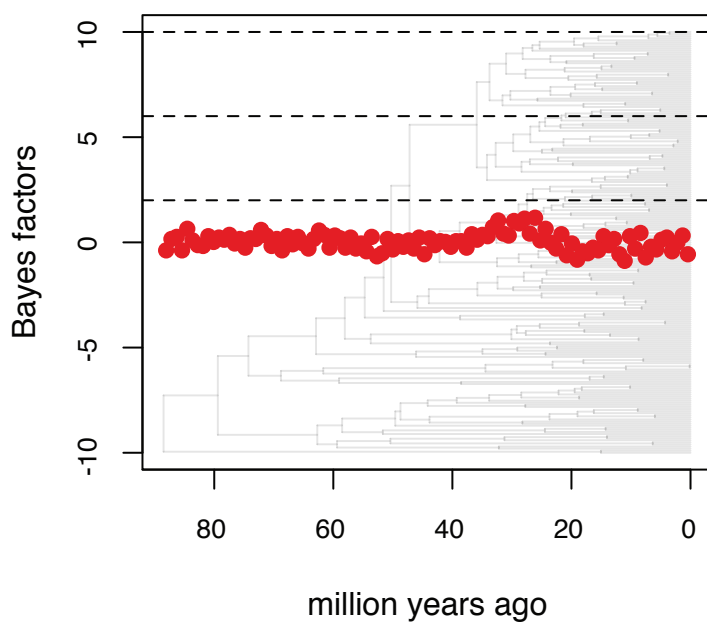



Fig. S4D

### net-diversification rates

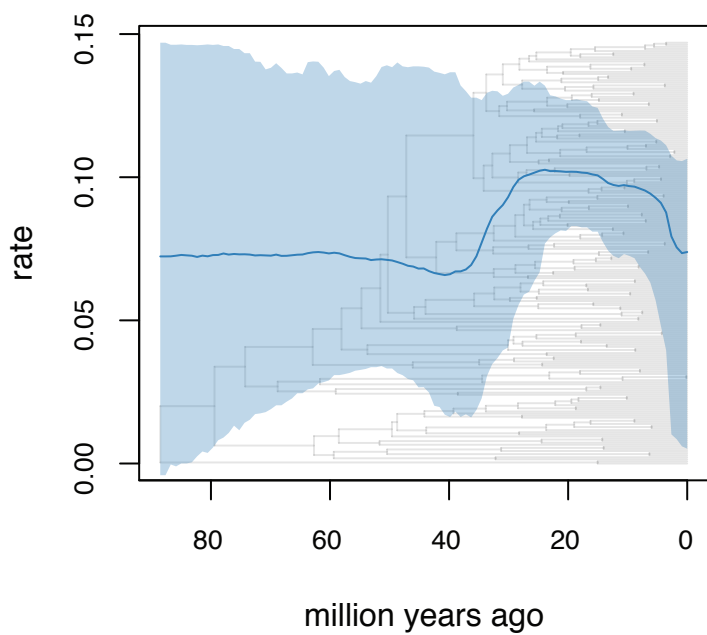

### relative-extinction rates

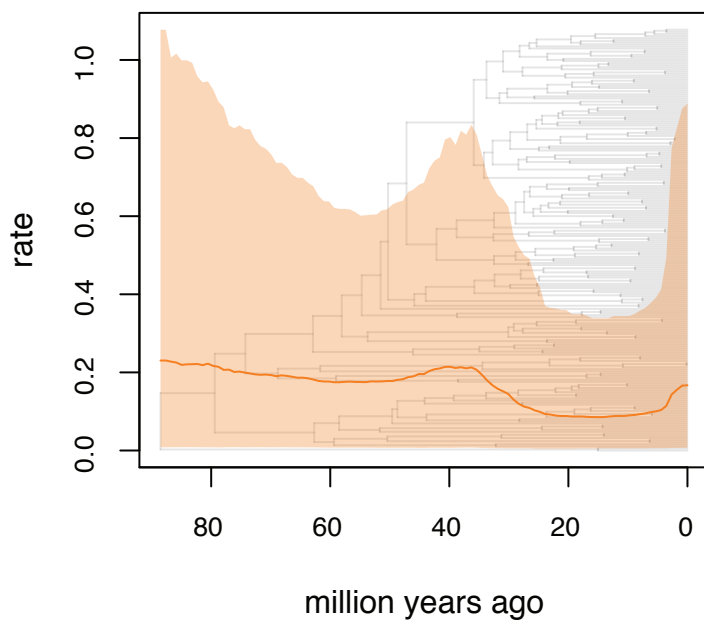

### mass extinction times

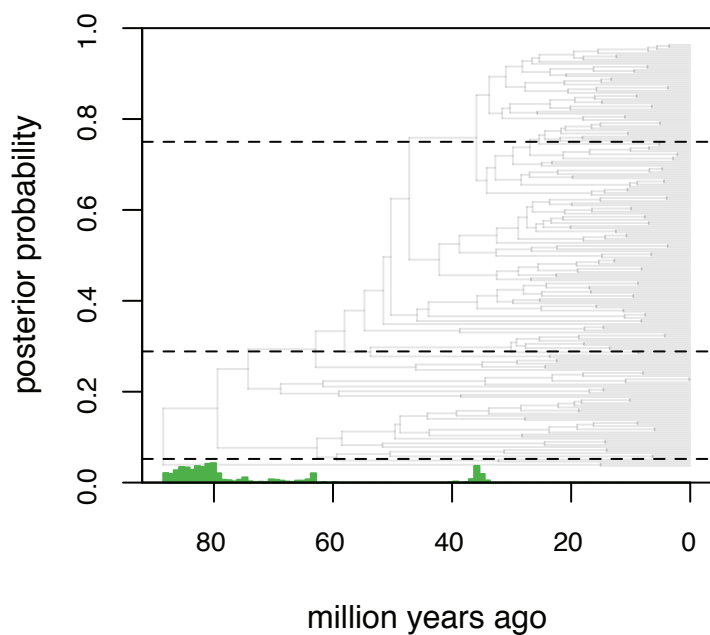

### mass extinction Bayes factors

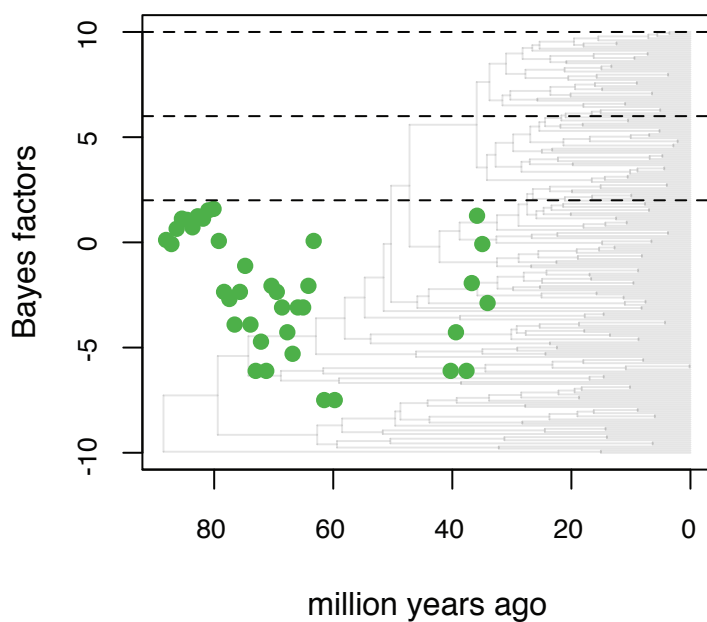

Figure S5

A

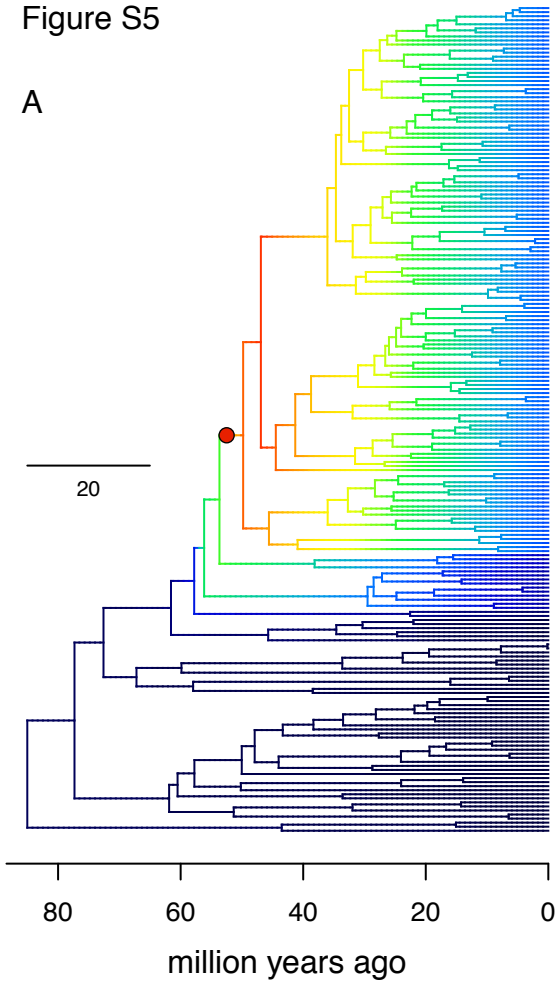

B

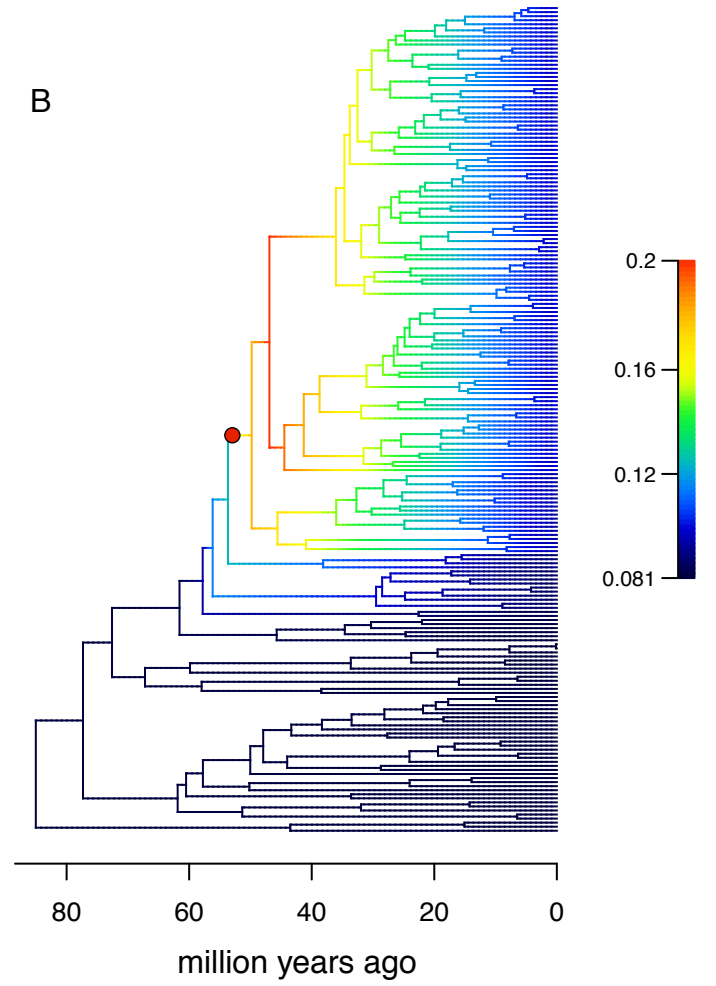

C

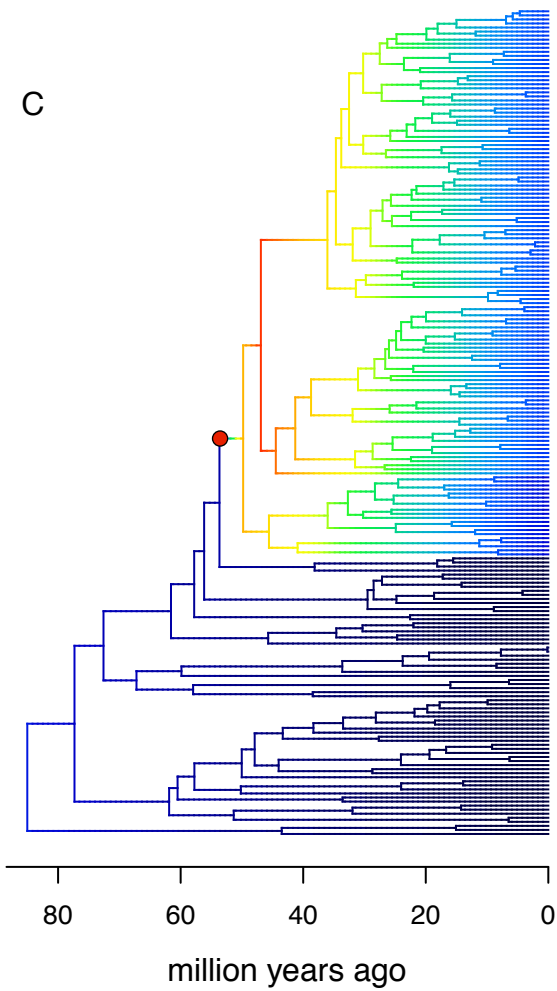

D

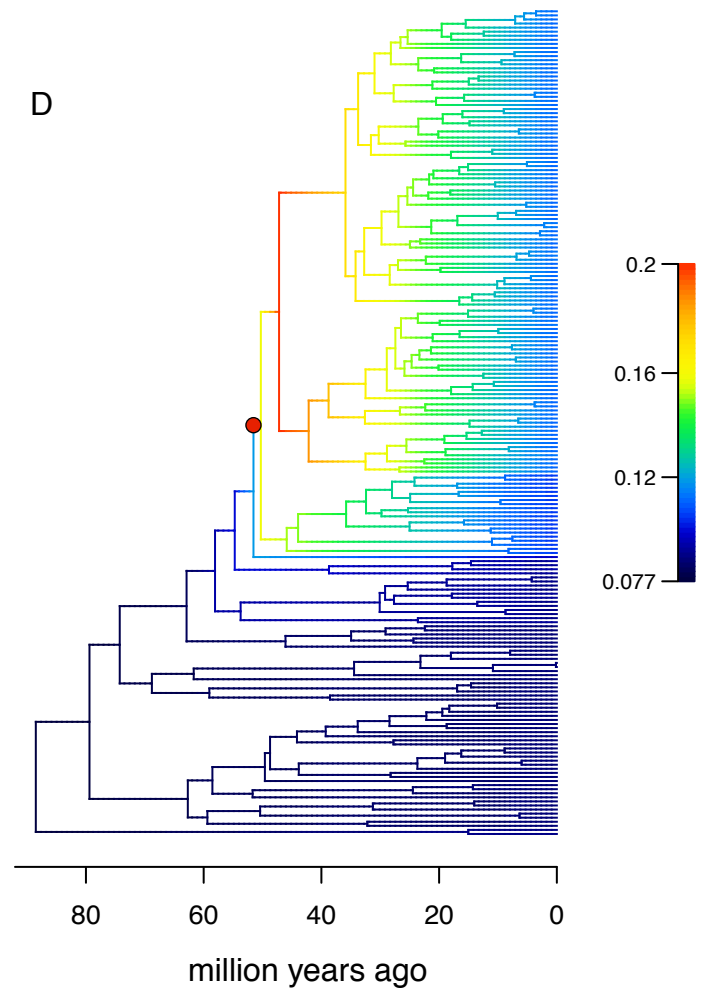

Supplement: EVO-72-1815-s001.pdf [file EVO-72-1815-s001.pdf]
